# Supplementary material for: Understanding the Pathogenesis of Kawasaki Disease by Network and Pathway Analysis
Source: Hindawi journal article supplement (doi:10.1155/2013/989307), 2013-01-01
Supplement: f1 [file 989307.f1.xls]

## Sheet: Sheet1
Annotation Cluster 1	Enrichment Score: 15.911556934933271
Category	Term	Count	%	PValue	Genes	Fold Enrichment	Bonferroni	Benjamini	FDR
GOTERM_BP_FAT	GO:0006952~defense response	26	3.40314	7.68547e-18	MBL2, TNF, MICA, CRP, HP, CCL5, IL10, MIF, SLC11A1, TNFRSF1A, NOD1, CCL3L1, IL1B, IL4, MSH5, IL1RN, HLA-C, CD40, HLA-B, NLRP1, HLA-G, CCR5, CD40LG, CCR3, CCR2, PLA2G7, CD14	8.93618	1.09595e-14	5.47974e-15	1.26915e-14
GOTERM_BP_FAT	GO:0009611~response to wounding	24	3.14136	5.56137e-17	MBL2, TNF, IL1RN, CRP, TGFBR2, SMAD3, CD40, CCL5, IL10, MIF, TGFB2, SLC11A1, TNFRSF1A, CASP3, NOD1, CCR5, CD40LG, FGB, CCL3L1, CCR3, CCR2, PLA2G7, IL1B, CD14	9.5717	1.58318e-13	5.27356e-14	1.88738e-13
GOTERM_BP_FAT	GO:0006954~inflammatory response	19	2.48691	4.30999e-15	MBL2, TNF, CRP, IL1RN, CD40, CCL5, IL10, MIF, SLC11A1, TNFRSF1A, NOD1, CCR5, CD40LG, CCL3L1, CCR3, CCR2, PLA2G7, IL1B, CD14	12.3573	6.17439e-12	1.54354e-12	7.14984e-12
Annotation Cluster 2	Enrichment Score: 15.037856026019254
Category	Term	Count	%	PValue	Genes	Fold Enrichment	Bonferroni	Benjamini	FDR
SP_PIR_KEYWORDS	Secreted	34	4.45026	1.20613e-17	MBL2, TNF, IL18, CRP, HP, TIMP4, CCL5, TIMP2, MMP3, IL10, MIF, TGFB2, TNFRSF1A, ACE, CCL3L1, FGB, IL1B, ANGPT1, COL11A2, FCGR3B, LTA, IL4, IL1RN, HLA-C, HLA-B, CD40, MMP13, MMP12, MMP11, RETN, CD40LG, CD209, VEGFA, PLA2G7, ABO	5.61167	2.26753e-15	1.13377e-15	1.49644e-14
GOTERM_CC_FAT	GO:0044421~extracellular region part	29	3.79581	7.14438e-16	MBL2, MICA, TNF, IL18, CRP, HP, TIMP4, TIMP2, MMP3, CCL5, IL10, MIF, TGFB2, ACE, CCL3L1, FGB, IL1B, ANGPT1, COL11A2, LTA, IL4, IL1RN, MMP13, MMP12, MMP11, RETN, CD40LG, VEGFA, PLA2G7	6.12894	8.4599e-14	8.4599e-14	7.77156e-13
GOTERM_CC_FAT	GO:0005615~extracellular space	25	3.27225	2.96322e-15	MBL2, TNF, MICA, IL18, CRP, HP, TIMP4, MMP3, CCL5, IL10, TGFB2, MIF, ACE, FGB, CCL3L1, IL1B, ANGPT1, LTA, IL4, IL1RN, MMP13, RETN, CD40LG, VEGFA, PLA2G7	7.4047	3.80695e-13	1.90292e-13	3.475e-12
GOTERM_CC_FAT	GO:0005576~extracellular region	37	4.84293	2.76345e-14	MBL2, MICA, TNF, IL18, CRP, HP, TIMP4, CCL5, MMP3, TIMP2, IL10, MIF, TGFB2, TNFRSF1A, ACE, CCL3L1, FGB, IL1B, ERAP1, ANGPT1, COL11A2, FCGR3B, LTA, IL4, IL1RN, HLA-C, HLA-B, CD40, MMP13, MMP12, MMP11, RETN, CD40LG, CD209, VEGFA, PLA2G7, ABO, CD14	3.73477	3.51086e-12	1.17029e-12	3.20632e-11
Annotation Cluster 4	Enrichment Score: 7.891713598282896
Category	Term	Count	%	PValue	Genes	Fold Enrichment	Bonferroni	Benjamini	FDR
GOTERM_BP_FAT	GO:0009617~response to bacterium	12	1.57068	1.20887e-09	TNFRSF1A, SLC11A1, MICA, NOD1, TNF, ERAP1, IL1B, TIMP4, CCL5, IL10, CD14, LTA	13.1425	1.72385e-06	2.46264e-07	1.99629e-06
GOTERM_BP_FAT	GO:0010033~response to organic substance	19	2.48691	2.62803e-09	TNF, MSH5, TGFBR2, IL1RN, SMAD3, TIMP4, MMP3, CCL5, MMP13, IL10, TGFB2, RETN, SLC11A1, TNFRSF1A, CASP3, IL1B, ANGPT1, LTA, CD14	5.57021	3.74757e-06	4.68447e-07	4.33985e-06
GOTERM_BP_FAT	GO:0032496~response to lipopolysaccharide	8	1.04712	6.28188e-08	TNFRSF1A, SLC11A1, IL1B, TIMP4, CCL5, IL10, CD14, LTA	21.961	8.95756e-05	5.26938e-06	0.000103737
GOTERM_BP_FAT	GO:0002237~response to molecule of bacterial origin	8	1.04712	1.35846e-07	TNFRSF1A, SLC11A1, IL1B, TIMP4, CCL5, IL10, CD14, LTA	19.6628	0.000193697	1.01955e-05	0.000224331
Annotation Cluster 5	Enrichment Score: 6.96851340875477
Category	Term	Count	%	PValue	Genes	Fold Enrichment	Bonferroni	Benjamini	FDR
GOTERM_MF_FAT	GO:0005125~cytokine activity	13	1.70157	8.59649e-11	IL4, TNF, IL18, IL1RN, CCL5, IL10, TGFB2, MIF, CCL3L1, CD40LG, VEGFA, IL1B, LTA	13.9602	2.35544e-08	2.35544e-08	1.13286e-07
GOTERM_BP_FAT	GO:0048534~hemopoietic or lymphoid organ development	10	1.3089	2.97974e-06	IL4, ACE, TNF, CD40LG, VEGFA, TGFBR2, IL10, LTA, KDR, TGFB2	8.12981	0.00424011	0.000124966	0.00492054
GOTERM_BP_FAT	GO:0002520~immune system development	10	1.3089	4.85243e-06	IL4, ACE, TNF, CD40LG, VEGFA, TGFBR2, IL10, LTA, KDR, TGFB2	7.65851	0.0068957	0.000192192	0.00801285
Annotation Cluster 6	Enrichment Score: 4.70368697407227
Category	Term	Count	%	PValue	Genes	Fold Enrichment	Bonferroni	Benjamini	FDR
GOTERM_BP_FAT	GO:0048002~antigen processing and presentation of peptide antigen	7	0.91623	2.77994e-09	SLC11A1, MICA, CD209, ERAP1, HLA-C, HLA-B, HLA-E, HLA-G	52.8437	3.96418e-06	4.40465e-07	4.5907e-06
GOTERM_BP_FAT	GO:0019882~antigen processing and presentation	9	1.17801	4.19251e-09	SLC11A1, MICB, MICA, CD209, ERAP1, HLA-C, HLA-B, HLA-E, HLA-DOB, HLA-G	22.9202	5.97851e-06	5.97852e-07	6.92338e-06
SP_PIR_KEYWORDS	immune response	11	1.43979	6.04908e-09	MBL2, MICB, MICA, CD209, ERAP1, HLA-C, HLA-B, HLA-E, HLA-DOB, HLA-G, CD14, MIF	13.6895	1.13723e-06	1.89538e-07	7.50502e-06
GOTERM_BP_FAT	GO:0002474~antigen processing and presentation of peptide antigen via MHC class I	5	0.65445	9.71225e-07	MICA, ERAP1, HLA-C, HLA-B, HLA-E, HLA-G	62.1691	0.00138401	5.53971e-05	0.00160384
KEGG_PATHWAY	hsa04940:Type I diabetes mellitus	7	0.91623	1.60813e-06	TNF, IL1B, HLA-C, HLA-B, HLA-E, HLA-DOB, HLA-G, LTA	18.0319	0.000120602	3.0152e-05	0.00168772
GOTERM_CC_FAT	GO:0042611~MHC protein complex	6	0.78534	7.85939e-06	MICB, MICA, HLA-C, HLA-B, HLA-E, HLA-DOB, HLA-G	21.3567	0.000997649	0.000199609	0.0091142
GOTERM_CC_FAT	GO:0042612~MHC class I protein complex	5	0.65445	9.41625e-06	MICB, MICA, HLA-C, HLA-B, HLA-E, HLA-G	36.2302	0.00119516	0.000199292	0.0109195
KEGG_PATHWAY	hsa05332:Graft-versus-host disease	6	0.78534	2.21912e-05	TNF, IL1B, HLA-C, HLA-B, HLA-E, HLA-DOB, HLA-G	16.6448	0.00166297	0.000277354	0.0232873
KEGG_PATHWAY	hsa05416:Viral myocarditis	7	0.91623	3.60662e-05	CASP3, CD40LG, HLA-C, HLA-B, CD40, HLA-E, HLA-DOB, HLA-G	10.6668	0.00270136	0.00033807	0.0378452
GOTERM_MF_FAT	GO:0032393~MHC class I receptor activity	4	0.52356	6.40366e-05	MICA, HLA-C, HLA-B, HLA-E, HLA-G	49.2713	0.0173935	0.00583179	0.0843556
KEGG_PATHWAY	hsa04514:Cell adhesion molecules (CAMs)	8	1.04712	0.000155832	CD40LG, CTLA4, HLA-C, HLA-B, CD40, HLA-E, HLA-DOB, PDCD1, HLA-G	6.55706	0.0116202	0.00116814	0.163425
KEGG_PATHWAY	hsa04650:Natural killer cell mediated cytotoxicity	8	1.04712	0.000163376	MICB, CASP3, MICA, TNF, HLA-C, HLA-B, HLA-E, FCGR3B, HLA-G	6.50776	0.0121794	0.0011134	0.171331
KEGG_PATHWAY	hsa04612:Antigen processing and presentation	5	0.65445	0.00639746	HLA-C, HLA-B, HLA-E, HLA-DOB, HLA-G, LTA	6.51756	0.382052	0.0337978	6.51389
KEGG_PATHWAY	hsa04144:Endocytosis	6	0.78534	0.0242296	CCR5, TGFBR2, HLA-C, HLA-B, HLA-E, HLA-G, KDR	3.52798	0.841118	0.108611	22.6958
SP_PIR_KEYWORDS	heterodimer	3	0.39267	0.0514803	MICA, HLA-C, HLA-B, HLA-E	8.11946	0.999952	0.224911	48.0941
Annotation Cluster 7	Enrichment Score: 4.045782555477643
Category	Term	Count	%	PValue	Genes	Fold Enrichment	Bonferroni	Benjamini	FDR
SP_PIR_KEYWORDS	glycoprotein	45	5.89005	9.97559e-14	MICB, MICA, TNF, HP, CCL5, MMP3, NAALADL2, PDCD1, IL10, TGFB2, TNFRSF1A, SLC11A1, AGTR1, ACE, FGB, ERAP1, ANGPT1, COL11A2, HLA-DOB, FCGR3B, LTA, IL4, IL1RN, TGFBR2, CTLA4, BTNL2, HLA-C, HLA-B, CD40, HLA-E, MMP13, HLA-G, MMP12, KDR, CCR5, FCGR2B, CD40LG, CCR3, CD209, VEGFA, CCR2, PLA2G7, ABCC4, FCGR2A, ABO, CD14	2.90518	1.87641e-11	6.25466e-12	1.23834e-10
SP_PIR_KEYWORDS	transmembrane protein	18	2.35602	5.9092e-11	MICA, HLA-C, CD40, HLA-B, HLA-E, HLA-G, KDR, AGTR1, SLC11A1, TNFRSF1A, ACE, FCGR2B, CCR5, CD40LG, CCR3, CCR2, FCGR2A, FCGR3B, HLA-DOB	7.81593	1.11093e-08	2.22186e-09	7.33147e-08
GOTERM_CC_FAT	GO:0005887~integral to plasma membrane	16	2.09424	0.000430981	MICB, MICA, TNF, TGFBR2, CTLA4, HLA-C, CD40, HLA-B, ITPR3, KDR, AGTR1, SLC11A1, TNFRSF1A, CCR5, CD40LG, CCR3, CCR2	2.73251	0.0532748	0.00606447	0.498672
GOTERM_CC_FAT	GO:0031226~intrinsic to plasma membrane	16	2.09424	0.000547481	MICB, MICA, TNF, TGFBR2, CTLA4, HLA-C, CD40, HLA-B, ITPR3, KDR, AGTR1, SLC11A1, TNFRSF1A, CCR5, CD40LG, CCR3, CCR2	2.67179	0.0671857	0.00693079	0.633079
GOTERM_CC_FAT	GO:0044459~plasma membrane part	22	2.87958	0.00112869	MICB, MICA, TNF, TGFBR2, CTLA4, HLA-C, CD40, HLA-B, HLA-E, ITPR3, HLA-G, PDCD1, KDR, AGTR1, SLC11A1, TNFRSF1A, ACE, CCR5, CD40LG, FGB, CCR3, CCR2, HLA-DOB	2.02613	0.133614	0.0118809	1.30115
GOTERM_CC_FAT	GO:0005886~plasma membrane	30	3.9267	0.00303533	MICB, MICA, TNF, PDCD1, AGTR1, SLC11A1, TNFRSF1A, CASP3, ACE, FGB, HLA-DOB, FCGR3B, TGFBR2, CTLA4, SMAD3, HLA-C, CD40, HLA-B, HLA-E, ITPR3, HLA-G, KDR, CCR5, FCGR2B, CD40LG, CCR3, CD209, CCR2, ABCC4, FCGR2A, CD14	1.61151	0.320279	0.0271999	3.46402
SP_PIR_KEYWORDS	cell membrane	17	2.22513	0.00351053	MICB, MICA, TNF, HLA-C, CD40, HLA-B, AGTR1, TNFRSF1A, ACE, FCGR2B, CCR5, CD40LG, CCR3, CD209, CCR2, FCGR2A, FCGR3B, CD14	2.16001	0.483738	0.028336	4.26932
SP_PIR_KEYWORDS	membrane	32	4.18848	0.016539	MICB, MICA, TNF, NAALADL2, PDCD1, TNFRSF1A, AGTR1, SLC11A1, ACE, ERAP1, HLA-DOB, FCGR3B, LTA, TGFBR2, CTLA4, BTNL2, HLA-C, CD40, HLA-B, HLA-E, ITPR3, HLA-G, KDR, CCR5, FCGR2B, CD40LG, CCR3, CD209, CCR2, ABCC4, FCGR2A, ABO, CD14	1.42592	0.956514	0.093332	18.691
GOTERM_CC_FAT	GO:0031224~intrinsic to membrane	33	4.31937	0.104467	MICB, MICA, TNF, NAALADL2, PDCD1, TNFRSF1A, AGTR1, SLC11A1, ACE, ERAP1, HLA-DOB, FCGR3B, LTA, TGFBR2, CTLA4, BTNL2, HLA-C, CD40, HLA-B, HLA-E, ITPR3, NFKBIL1, HLA-G, KDR, CCR5, FCGR2B, CD40LG, CCR3, CD209, CCR2, ABCC4, FCGR2A, ABO, CD14	1.22066	0.999999	0.442259	72.1844
GOTERM_CC_FAT	GO:0016021~integral to membrane	32	4.18848	0.107633	MICB, MICA, TNF, NAALADL2, PDCD1, AGTR1, SLC11A1, TNFRSF1A, ACE, ERAP1, HLA-DOB, LTA, TGFBR2, CTLA4, BTNL2, HLA-C, CD40, HLA-B, HLA-E, ITPR3, NFKBIL1, HLA-G, KDR, CCR5, FCGR2B, CD40LG, CCR3, CD209, CCR2, ABCC4, FCGR2A, ABO, CD14	1.22568	0.999999	0.426643	73.3036
Annotation Cluster 8	Enrichment Score: 3.753601464071526
Category	Term	Count	%	PValue	Genes	Fold Enrichment	Bonferroni	Benjamini	FDR
GOTERM_BP_FAT	GO:0006935~chemotaxis	9	1.17801	7.1667e-07	IL4, CCR5, CCL3L1, CCR3, CCR2, IL1B, CCL5, IL10, TGFB2	11.8898	0.00102145	4.64522e-05	0.00118348
GOTERM_BP_FAT	GO:0042330~taxis	9	1.17801	7.1667e-07	IL4, CCR5, CCL3L1, CCR3, CCR2, IL1B, CCL5, IL10, TGFB2	11.8898	0.00102145	4.64522e-05	0.00118348
GOTERM_BP_FAT	GO:0006968~cellular defense response	6	0.78534	9.07174e-06	IL4, CCR5, CCR3, CCR2, CCL5, HLA-G	20.791	0.012853	0.000275204	0.0149797
GOTERM_BP_FAT	GO:0007626~locomotory behavior	9	1.17801	3.7739e-05	IL4, CCR5, CCL3L1, CCR3, CCR2, IL1B, CCL5, IL10, TGFB2	6.94297	0.0523943	0.000802914	0.0623027
GOTERM_BP_FAT	GO:0006874~cellular calcium ion homeostasis	7	0.91623	0.000202353	AGTR1, CCR5, CCR3, CCR2, IL1B, ITPR3, CCL5	8.08538	0.250677	0.00297068	0.333635
GOTERM_BP_FAT	GO:0007610~behavior	10	1.3089	0.00030016	IL4, CCR5, CCL3L1, CCR3, IL18, CCR2, IL1B, CCL5, IL10, TGFB2	4.50693	0.348248	0.00399287	0.494522
GOTERM_BP_FAT	GO:0030595~leukocyte chemotaxis	4	0.52356	0.00066804	IL1B, CCL5, IL10, TGFB2	22.8514	0.614396	0.00741723	1.09748
GOTERM_BP_FAT	GO:0060326~cell chemotaxis	4	0.52356	0.000780553	IL1B, CCL5, IL10, TGFB2	21.6795	0.671593	0.00852883	1.2812
GOTERM_BP_FAT	GO:0007267~cell-cell signaling	7	0.91623	0.0598218	CCR5, IL18, IL1B, CCL5, IL10, LTA, TGFB2	2.46604	1	0.271245	63.8921
KEGG_PATHWAY	hsa04062:Chemokine signaling pathway	5	0.65445	0.0873655	CCR5, CCL3L1, CCR3, CCR2, CCL5	2.89282	0.998947	0.248502	61.6898
Annotation Cluster 9	Enrichment Score: 3.5789388747356132
Category	Term	Count	%	PValue	Genes	Fold Enrichment	Bonferroni	Benjamini	FDR
GOTERM_MF_FAT	GO:0005125~cytokine activity	13	1.70157	8.59649e-11	IL4, TNF, IL18, IL1RN, CCL5, IL10, TGFB2, MIF, CCL3L1, CD40LG, VEGFA, IL1B, LTA	13.9602	2.35544e-08	2.35544e-08	1.13286e-07
KEGG_PATHWAY	hsa05330:Allograft rejection	9	1.17801	5.93899e-10	IL4, TNF, CD40LG, HLA-C, HLA-B, CD40, HLA-E, HLA-DOB, HLA-G, IL10	27.0479	4.45424e-08	2.22712e-08	6.23299e-07
GOTERM_BP_FAT	GO:0001775~cell activation	13	1.70157	6.72225e-09	IL4, MICB, TNF, MICA, TGFBR2, SMAD3, CD40, IL10, NFKBIL1, SLC11A1, FGB, CD40LG, LTA	9.57448	9.58588e-06	8.71447e-07	1.11009e-05
KEGG_PATHWAY	hsa05320:Autoimmune thyroid disease	9	1.17801	1.13029e-08	IL4, CD40LG, CTLA4, HLA-C, HLA-B, CD40, HLA-E, HLA-DOB, HLA-G, IL10	19.0926	8.47719e-07	2.82573e-07	1.18625e-05
SP_PIR_KEYWORDS	cytokine	10	1.3089	1.44903e-08	IL4, TNF, CD40LG, CCL3L1, IL18, IL1B, CCL5, IL10, LTA, MIF	15.4016	2.72417e-06	3.89168e-07	1.79779e-05
GOTERM_BP_FAT	GO:0051223~regulation of protein transport	9	1.17801	5.22727e-08	TNF, CD40LG, SMAD3, IL1B, CD40, IL10, NFKBIL1, LTA, TGFB2	16.6875	7.45381e-05	4.65879e-06	8.63214e-05
GOTERM_BP_FAT	GO:0070201~regulation of establishment of protein localization	9	1.17801	8.33163e-08	TNF, CD40LG, SMAD3, IL1B, CD40, IL10, NFKBIL1, LTA, TGFB2	15.7221	0.000118802	6.60048e-06	0.000137586
SP_PIR_KEYWORDS	lymphokine	5	0.65445	1.39209e-07	IL4, TNF, IL1B, IL10, LTA	99.56	2.6171e-05	3.27141e-06	0.000172715
GOTERM_BP_FAT	GO:0032880~regulation of protein localization	9	1.17801	2.30969e-07	TNF, CD40LG, SMAD3, IL1B, CD40, IL10, NFKBIL1, LTA, TGFB2	13.7853	0.000329308	1.6468e-05	0.000381415
GOTERM_BP_FAT	GO:0002694~regulation of leukocyte activation	9	1.17801	9.47528e-07	IL4, CASP3, IL18, TGFBR2, CTLA4, IL1B, CD40, IL10, MIF	11.4601	0.00135026	5.62974e-05	0.00156471
GOTERM_BP_FAT	GO:0050865~regulation of cell activation	9	1.17801	1.4116e-06	IL4, CASP3, IL18, TGFBR2, CTLA4, IL1B, CD40, IL10, MIF	10.8707	0.00201092	7.45507e-05	0.00233105
GOTERM_BP_FAT	GO:0050670~regulation of lymphocyte proliferation	7	0.91623	2.28267e-06	IL4, CASP3, IL18, CTLA4, IL1B, CD40, IL10	17.8268	0.00324979	0.000108497	0.00376945
GOTERM_BP_FAT	GO:0032944~regulation of mononuclear cell proliferation	7	0.91623	2.44938e-06	IL4, CASP3, IL18, CTLA4, IL1B, CD40, IL10	17.6146	0.00348673	0.000109145	0.00404475
GOTERM_BP_FAT	GO:0070663~regulation of leukocyte proliferation	7	0.91623	2.44938e-06	IL4, CASP3, IL18, CTLA4, IL1B, CD40, IL10	17.6146	0.00348673	0.000109145	0.00404475
KEGG_PATHWAY	hsa05310:Asthma	6	0.78534	4.89638e-06	IL4, TNF, CD40LG, CD40, HLA-DOB, IL10	22.3844	0.000367162	7.34432e-05	0.00513865
GOTERM_BP_FAT	GO:0051249~regulation of lymphocyte activation	8	1.04712	5.3933e-06	IL4, CASP3, IL18, TGFBR2, CTLA4, IL1B, CD40, IL10	11.4257	0.00766137	0.000202371	0.00890595
GOTERM_BP_FAT	GO:0002637~regulation of immunoglobulin production	5	0.65445	5.91205e-06	IL4, TNF, CD40LG, CD40, IL10	40.649	0.00839518	0.000205604	0.00976253
GOTERM_BP_FAT	GO:0002697~regulation of immune effector process	7	0.91623	7.18152e-06	IL4, MICB, TNF, CD40LG, IL1B, CD40, IL10	14.6498	0.0101886	0.00023272	0.0118587
GOTERM_BP_FAT	GO:0042129~regulation of T cell proliferation	6	0.78534	9.83232e-06	IL4, CASP3, IL18, CTLA4, IL1B, IL10	20.4556	0.0139231	0.000286101	0.0162355
GOTERM_BP_FAT	GO:0045321~leukocyte activation	9	1.17801	1.54838e-05	IL4, SLC11A1, MICB, MICA, CD40LG, TGFBR2, SMAD3, CD40, IL10	7.86105	0.021838	0.000408806	0.0255663
GOTERM_BP_FAT	GO:0050863~regulation of T cell activation	7	0.91623	1.6727e-05	IL4, CASP3, IL18, TGFBR2, CTLA4, IL1B, IL10	12.6464	0.0235707	0.000433596	0.0276189
KEGG_PATHWAY	hsa05322:Systemic lupus erythematosus	8	1.04712	2.46248e-05	TNF, FCGR2B, CD40LG, FCGR2A, CD40, FCGR3B, HLA-DOB, IL10	8.74275	0.00184518	0.000263806	0.0258408
GOTERM_BP_FAT	GO:0046649~lymphocyte activation	8	1.04712	3.69605e-05	IL4, SLC11A1, MICB, MICA, CD40LG, SMAD3, CD40, IL10	8.49749	0.0513418	0.000798268	0.061018
GOTERM_BP_FAT	GO:0002700~regulation of production of molecular mediator of immune response	5	0.65445	3.80067e-05	IL4, TNF, CD40LG, CD40, IL10	25.7774	0.052756	0.000796719	0.0627445
GOTERM_BP_FAT	GO:0032943~mononuclear cell proliferation	5	0.65445	5.04176e-05	SLC11A1, ACE, CD40LG, CD40, IL10	24.0199	0.0693735	0.00101212	0.0832254
GOTERM_BP_FAT	GO:0070661~leukocyte proliferation	5	0.65445	5.04176e-05	SLC11A1, ACE, CD40LG, CD40, IL10	24.0199	0.0693735	0.00101212	0.0832254
KEGG_PATHWAY	hsa04672:Intestinal immune network for IgA production	6	0.78534	6.87058e-05	IL4, CD40LG, CD40, HLA-DOB, IL10, TGFB2	13.2479	0.00513986	0.000572404	0.0720835
GOTERM_BP_FAT	GO:0002822~regulation of adaptive immune response based on somatic recombination of immune receptors built from immunoglobulin superfamily domains	5	0.65445	0.000121907	IL4, SLC11A1, IL1B, CD40, IL10	19.2159	0.159576	0.00209238	0.201122
GOTERM_BP_FAT	GO:0042092~T-helper 2 type immune response	3	0.39267	0.000127301	IL4, IL18, IL10	158.531	0.166018	0.0021589	0.210014
GOTERM_BP_FAT	GO:0002819~regulation of adaptive immune response	5	0.65445	0.000130828	IL4, SLC11A1, IL1B, CD40, IL10	18.8728	0.170202	0.00219257	0.215826
GOTERM_BP_FAT	GO:0060341~regulation of cellular localization	8	1.04712	0.000147525	TNF, CD40LG, SMAD3, IL1B, CD40, IL10, NFKBIL1, TGFB2	6.81855	0.189729	0.00238789	0.243339
GOTERM_BP_FAT	GO:0050708~regulation of protein secretion	5	0.65445	0.000150076	TNF, CD40LG, CD40, IL10, TGFB2	18.222	0.192671	0.00240188	0.247542
GOTERM_BP_FAT	GO:0043066~negative regulation of apoptosis	9	1.17801	0.000224157	IL4, CASP3, TNF, CD40LG, VEGFA, SMAD3, IL1B, IL10, MIF	5.37394	0.273622	0.00316019	0.369523
GOTERM_BP_FAT	GO:0043069~negative regulation of programmed cell death	9	1.17801	0.000246525	IL4, CASP3, TNF, CD40LG, VEGFA, SMAD3, IL1B, IL10, MIF	5.29909	0.29643	0.00340766	0.406327
GOTERM_BP_FAT	GO:0060548~negative regulation of cell death	9	1.17801	0.000251212	IL4, CASP3, TNF, CD40LG, VEGFA, SMAD3, IL1B, IL10, MIF	5.28437	0.301118	0.00343901	0.414036
GOTERM_BP_FAT	GO:0030888~regulation of B cell proliferation	4	0.52356	0.000290194	IL4, CASP3, CD40, IL10	30.1964	0.338918	0.00389689	0.47814
GOTERM_BP_FAT	GO:0051046~regulation of secretion	7	0.91623	0.000344473	AGTR1, TNF, CD40LG, IL1B, CD40, IL10, TGFB2	7.32488	0.388171	0.00441637	0.567333
GOTERM_BP_FAT	GO:0051023~regulation of immunoglobulin secretion	3	0.39267	0.00075241	TNF, CD40LG, CD40	70.4583	0.658135	0.00828595	1.23528
GOTERM_BP_FAT	GO:0046651~lymphocyte proliferation	4	0.52356	0.000970801	SLC11A1, CD40LG, CD40, IL10	20.131	0.749685	0.0104378	1.59113
GOTERM_BP_FAT	GO:0051251~positive regulation of lymphocyte activation	5	0.65445	0.00107035	IL4, IL18, TGFBR2, IL1B, CD40	10.8956	0.782842	0.0114165	1.75294
BIOCARTA	h_asbcellPathway:Antigen Dependent B Cell Activation	4	0.52356	0.00116392	IL4, CD40LG, CD40, IL10	17.1071	0.0772134	0.0393822	1.19452
GOTERM_BP_FAT	GO:0046006~regulation of activated T cell proliferation	3	0.39267	0.00136705	IL4, CASP3, IL18	52.8438	0.857831	0.0141381	2.23371
GOTERM_BP_FAT	GO:0002696~positive regulation of leukocyte activation	5	0.65445	0.00148748	IL4, IL18, TGFBR2, IL1B, CD40	9.97052	0.880295	0.015048	2.42824
GOTERM_BP_FAT	GO:0042100~B cell proliferation	3	0.39267	0.00161076	CD40LG, CD40, IL10	48.7788	0.89962	0.0161713	2.62698
GOTERM_BP_FAT	GO:0045191~regulation of isotype switching	3	0.39267	0.00161076	IL4, CD40, IL10	48.7788	0.89962	0.0161713	2.62698
GOTERM_BP_FAT	GO:0050864~regulation of B cell activation	4	0.52356	0.00170939	IL4, CASP3, CD40, IL10	16.5784	0.912811	0.016916	2.78571
GOTERM_BP_FAT	GO:0050867~positive regulation of cell activation	5	0.65445	0.00176252	IL4, IL18, TGFBR2, IL1B, CD40	9.5214	0.919183	0.0171991	2.87111
GOTERM_BP_FAT	GO:0002706~regulation of lymphocyte mediated immunity	4	0.52356	0.00201591	IL4, IL1B, CD40, IL10	15.6574	0.94373	0.0193851	3.27746
GOTERM_BP_FAT	GO:0050671~positive regulation of lymphocyte proliferation	4	0.52356	0.00212518	IL4, IL18, IL1B, CD40	15.3727	0.951865	0.0202896	3.4522
GOTERM_BP_FAT	GO:0032946~positive regulation of mononuclear cell proliferation	4	0.52356	0.00223807	IL4, IL18, IL1B, CD40	15.0982	0.959036	0.0210752	3.63241
GOTERM_BP_FAT	GO:0070665~positive regulation of leukocyte proliferation	4	0.52356	0.00223807	IL4, IL18, IL1B, CD40	15.0982	0.959036	0.0210752	3.63241
KEGG_PATHWAY	hsa04660:T cell receptor signaling pathway	6	0.78534	0.00270031	IL4, TNF, CD40LG, CTLA4, PDCD1, IL10	6.01064	0.183556	0.0154787	2.79793
GOTERM_BP_FAT	GO:0051091~positive regulation of transcription factor activity	4	0.52356	0.00272662	IL4, TNF, IL1B, IL10	14.0917	0.979625	0.0251265	4.40867
GOTERM_BP_FAT	GO:0032655~regulation of interleukin-12 production	3	0.39267	0.00277501	CD40LG, CD40, IL10	37.3015	0.980988	0.0254034	4.48524
GOTERM_BP_FAT	GO:0002703~regulation of leukocyte mediated immunity	4	0.52356	0.0028582	IL4, IL1B, CD40, IL10	13.8607	0.98312	0.0259894	4.61673
GOTERM_BP_FAT	GO:0002521~leukocyte differentiation	5	0.65445	0.00321769	IL4, TNF, CD40LG, TGFBR2, IL10	8.06775	0.989906	0.0283153	5.18301
GOTERM_BP_FAT	GO:0008283~cell proliferation	8	1.04712	0.00401691	SLC11A1, ACE, CD40LG, VEGFA, CD40, IL10, MIF, TGFB2	3.87844	0.996784	0.033199	6.43066
GOTERM_BP_FAT	GO:0043388~positive regulation of DNA binding	4	0.52356	0.00422015	IL4, TNF, IL1B, IL10	12.0786	0.997596	0.0342587	6.74547
GOTERM_BP_FAT	GO:0050870~positive regulation of T cell activation	4	0.52356	0.0053137	IL4, IL18, TGFBR2, IL1B	11.125	0.999498	0.0411066	8.42233
GOTERM_BP_FAT	GO:0042113~B cell activation	4	0.52356	0.0053137	IL4, CD40LG, CD40, IL10	11.125	0.999498	0.0411066	8.42233
BIOCARTA	h_th1th2Pathway:Th1/Th2 Differentiation	4	0.52356	0.00545372	IL4, CD40LG, IL18, CD40	10.2643	0.314315	0.11819	5.48666
GOTERM_BP_FAT	GO:0002712~regulation of B cell mediated immunity	3	0.39267	0.00551486	IL4, CD40, IL10	26.4219	0.999624	0.0421774	8.72769
GOTERM_BP_FAT	GO:0002889~regulation of immunoglobulin mediated immune response	3	0.39267	0.00551486	IL4, CD40, IL10	26.4219	0.999624	0.0421774	8.72769
GOTERM_BP_FAT	GO:0051098~regulation of binding	5	0.65445	0.00558683	IL4, TNF, SMAD3, IL1B, IL10	6.90768	0.999661	0.0424902	8.83669
GOTERM_BP_FAT	GO:0051099~positive regulation of binding	4	0.52356	0.00571257	IL4, TNF, IL1B, IL10	10.8397	0.999717	0.0431985	9.02687
GOTERM_BP_FAT	GO:0000018~regulation of DNA recombination	3	0.39267	0.00645525	IL4, CD40, IL10	24.3894	0.999902	0.047443	10.1425
GOTERM_BP_FAT	GO:0051090~regulation of transcription factor activity	4	0.52356	0.0122336	IL4, TNF, IL1B, IL10	8.20874	1	0.0773605	18.394
GOTERM_BP_FAT	GO:0042102~positive regulation of T cell proliferation	3	0.39267	0.0141584	IL4, IL18, IL1B	16.2596	1	0.0871509	20.9807
GOTERM_BP_FAT	GO:0006916~anti-apoptosis	5	0.65445	0.0154603	TNF, CD40LG, VEGFA, IL1B, IL10	5.13046	1	0.093634	22.6864
GOTERM_BP_FAT	GO:0051101~regulation of DNA binding	4	0.52356	0.0187825	IL4, TNF, IL1B, IL10	6.9876	1	0.109565	26.8836
GOTERM_BP_FAT	GO:0042110~T cell activation	4	0.52356	0.0208861	SLC11A1, MICB, MICA, SMAD3	6.71032	1	0.119267	29.4296
GOTERM_BP_FAT	GO:0030183~B cell differentiation	3	0.39267	0.0209843	IL4, CD40LG, IL10	13.2109	1	0.119326	29.5464
BBID	58.(CD40L)_immnosurveillance	4	0.52356	0.024043	TNF, CD40LG, CD40, IL10	5.59375	0.703835	0.333432	20.8953
GOTERM_BP_FAT	GO:0031328~positive regulation of cellular biosynthetic process	8	1.04712	0.0392865	IL4, TNFRSF1A, SLC11A1, TNF, VEGFA, SMAD3, IL1B, IL10	2.46861	1	0.19141	48.4105
BBID	5.B7_CD40_B-cell_activa	3	0.39267	0.0396991	IL4, CTLA4, CD40	8.39062	0.868063	0.286499	32.3048
BBID	50.Hypothesis_of_bronchial_asthma	3	0.39267	0.0498076	IL4, CD40LG, CD40	7.45833	0.922272	0.305757	38.8644
BIOCARTA	h_dcPathway:Dendritic cells in regulating TH1 and TH2 Development	3	0.39267	0.0573334	IL4, CD40, IL10	7.33163	0.98299	0.399049	45.6236
BBID	55.Allergen_recognition_by_Th2_or_Th0_cell	3	0.39267	0.0607559	IL4, CD40LG, CD40	6.7125	0.956457	0.324127	45.3213
BBID	19.Cytokine_microglia	3	0.39267	0.0724664	TNF, CD40, IL10	6.10227	0.976747	0.341587	51.545
GOTERM_BP_FAT	GO:0030098~lymphocyte differentiation	3	0.39267	0.0831425	IL4, CD40LG, IL10	6.15655	1	0.342689	76.1513
GOTERM_BP_FAT	GO:0051052~regulation of DNA metabolic process	3	0.39267	0.0987416	IL4, CD40, IL10	5.5625	1	0.387925	82.0363
GOTERM_BP_FAT	GO:0032268~regulation of cellular protein metabolic process	5	0.65445	0.178889	IL4, AGTR1, TNF, IL1B, IL10	2.22969	1	0.579987	96.1411
GOTERM_BP_FAT	GO:0008104~protein localization	6	0.78534	0.392818	SLC11A1, TNF, CD40LG, IL10, NFKBIL1, TGFB2	1.43793	1	0.878147	99.9736
Annotation Cluster 10	Enrichment Score: 3.4995907610915062
Category	Term	Count	%	PValue	Genes	Fold Enrichment	Bonferroni	Benjamini	FDR
GOTERM_BP_FAT	GO:0002250~adaptive immune response	8	1.04712	6.28188e-08	IL4, MBL2, SLC11A1, CD40LG, IL18, VEGFA, CRP, IL10	21.961	8.95756e-05	5.26938e-06	0.000103737
GOTERM_BP_FAT	GO:0002460~adaptive immune response based on somatic recombination of immune receptors built from immunoglobulin superfamily domains	8	1.04712	6.28188e-08	IL4, MBL2, SLC11A1, CD40LG, IL18, VEGFA, CRP, IL10	21.961	8.95756e-05	5.26938e-06	0.000103737
GOTERM_BP_FAT	GO:0002252~immune effector process	5	0.65445	0.00349005	MBL2, SLC11A1, MICA, CD40LG, CRP	7.88713	0.993164	0.0301229	5.60993
GOTERM_BP_FAT	GO:0002449~lymphocyte mediated immunity	4	0.52356	0.00422015	MBL2, SLC11A1, CD40LG, CRP	12.0786	0.997596	0.0342587	6.74547
GOTERM_BP_FAT	GO:0002443~leukocyte mediated immunity	4	0.52356	0.00748526	MBL2, SLC11A1, CD40LG, CRP	9.8314	0.999978	0.0531967	11.6686
GOTERM_BP_FAT	GO:0016064~immunoglobulin mediated immune response	3	0.39267	0.026152	MBL2, CD40LG, CRP	11.7431	1	0.139769	35.4424
GOTERM_BP_FAT	GO:0019724~B cell mediated immunity	3	0.39267	0.0279779	MBL2, CD40LG, CRP	11.3237	1	0.14727	37.4125
Annotation Cluster 11	Enrichment Score: 3.4386079693226996
Category	Term	Count	%	PValue	Genes	Fold Enrichment	Bonferroni	Benjamini	FDR
GOTERM_MF_FAT	GO:0005149~interleukin-1 receptor binding	4	0.52356	5.2913e-05	IL18, IL1RN, ERAP1, IL1B	52.3508	0.0143939	0.00722306	0.0697071
INTERPRO	IPR000975:Interleukin-1	3	0.39267	0.000702293	IL18, IL1RN, IL1B	73.4956	0.113821	0.0100192	0.855101
SMART	SM00125:IL1	3	0.39267	0.00130046	IL18, IL1RN, IL1B	53.4059	0.0519551	0.0132498	1.19041
Annotation Cluster 12	Enrichment Score: 3.359941383274346
Category	Term	Count	%	PValue	Genes	Fold Enrichment	Bonferroni	Benjamini	FDR
SP_PIR_KEYWORDS	host-virus interaction	9	1.17801	7.20681e-06	TNFRSF1A, MICB, CCR5, FCGR2B, CCR3, CD209, CCR2, HLA-C, HLA-B, KDR	8.8032	0.00135397	0.000123164	0.00894104
SP_PIR_KEYWORDS	receptor	14	1.83246	0.00328897	TGFBR2, IL1RN, CD40, ITPR3, KDR, TNFRSF1A, AGTR1, FCGR2B, CCR5, CD209, CCR3, CCR2, FCGR2A, FCGR3B	2.46542	0.461703	0.0277595	4.00491
SP_PIR_KEYWORDS	cell membrane	17	2.22513	0.00351053	MICB, MICA, TNF, HLA-C, CD40, HLA-B, AGTR1, TNFRSF1A, ACE, FCGR2B, CCR5, CD40LG, CCR3, CD209, CCR2, FCGR2A, FCGR3B, CD14	2.16001	0.483738	0.028336	4.26932
Annotation Cluster 13	Enrichment Score: 3.3156591713782917
Category	Term	Count	%	PValue	Genes	Fold Enrichment	Bonferroni	Benjamini	FDR
GOTERM_BP_FAT	GO:0050670~regulation of lymphocyte proliferation	7	0.91623	2.28267e-06	IL4, CASP3, IL18, CTLA4, IL1B, CD40, IL10	17.8268	0.00324979	0.000108497	0.00376945
GOTERM_BP_FAT	GO:0070663~regulation of leukocyte proliferation	7	0.91623	2.44938e-06	IL4, CASP3, IL18, CTLA4, IL1B, CD40, IL10	17.6146	0.00348673	0.000109145	0.00404475
GOTERM_BP_FAT	GO:0032944~regulation of mononuclear cell proliferation	7	0.91623	2.44938e-06	IL4, CASP3, IL18, CTLA4, IL1B, CD40, IL10	17.6146	0.00348673	0.000109145	0.00404475
GOTERM_BP_FAT	GO:0051249~regulation of lymphocyte activation	8	1.04712	5.3933e-06	IL4, CASP3, IL18, TGFBR2, CTLA4, IL1B, CD40, IL10	11.4257	0.00766137	0.000202371	0.00890595
GOTERM_BP_FAT	GO:0042129~regulation of T cell proliferation	6	0.78534	9.83232e-06	IL4, CASP3, IL18, CTLA4, IL1B, IL10	20.4556	0.0139231	0.000286101	0.0162355
GOTERM_BP_FAT	GO:0050863~regulation of T cell activation	7	0.91623	1.6727e-05	IL4, CASP3, IL18, TGFBR2, CTLA4, IL1B, IL10	12.6464	0.0235707	0.000433596	0.0276189
GOTERM_BP_FAT	GO:0002683~negative regulation of immune system process	5	0.65445	0.000595921	MICB, CASP3, CTLA4, IL10, TGFB2	12.7334	0.572601	0.00683169	0.979549
GOTERM_BP_FAT	GO:0042130~negative regulation of T cell proliferation	3	0.39267	0.00695087	CASP3, CTLA4, IL10	23.4861	0.999952	0.050231	10.8799
GOTERM_BP_FAT	GO:0070664~negative regulation of leukocyte proliferation	3	0.39267	0.00967682	CASP3, CTLA4, IL10	19.8164	0.999999	0.0638974	14.8349
GOTERM_BP_FAT	GO:0032945~negative regulation of mononuclear cell proliferation	3	0.39267	0.00967682	CASP3, CTLA4, IL10	19.8164	0.999999	0.0638974	14.8349
GOTERM_BP_FAT	GO:0050672~negative regulation of lymphocyte proliferation	3	0.39267	0.00967682	CASP3, CTLA4, IL10	19.8164	0.999999	0.0638974	14.8349
GOTERM_BP_FAT	GO:0050868~negative regulation of T cell activation	3	0.39267	0.0163052	CASP3, CTLA4, IL10	15.0982	1	0.0973048	23.7748
GOTERM_BP_FAT	GO:0051250~negative regulation of lymphocyte activation	3	0.39267	0.026152	CASP3, CTLA4, IL10	11.7431	1	0.139769	35.4424
GOTERM_BP_FAT	GO:0002695~negative regulation of leukocyte activation	3	0.39267	0.0289097	CASP3, CTLA4, IL10	11.125	1	0.151301	38.3959
GOTERM_BP_FAT	GO:0050866~negative regulation of cell activation	3	0.39267	0.0327588	CASP3, CTLA4, IL10	10.3955	1	0.166964	42.3066
Annotation Cluster 14	Enrichment Score: 3.1188426641623703
Category	Term	Count	%	PValue	Genes	Fold Enrichment	Bonferroni	Benjamini	FDR
GOTERM_BP_FAT	GO:0043123~positive regulation of I-kappaB kinase/NF-kappaB cascade	7	0.91623	5.68115e-06	TNFRSF1A, NOD1, TNF, IL1B, CD40, NFKBIL1, LTA	15.2539	0.00806861	0.000207705	0.00938125
GOTERM_BP_FAT	GO:0043122~regulation of I-kappaB kinase/NF-kappaB cascade	7	0.91623	1.00212e-05	TNFRSF1A, NOD1, TNF, IL1B, CD40, NFKBIL1, LTA	13.8283	0.0141887	0.000285767	0.0165475
GOTERM_BP_FAT	GO:0070304~positive regulation of stress-activated protein kinase signaling pathway	4	0.52356	0.000120585	NOD1, TNF, IL1B, TGFB2	40.2619	0.157991	0.00209493	0.198944
KEGG_PATHWAY	hsa04621:NOD-like receptor signaling pathway	6	0.78534	0.000213602	NOD1, TNF, IL18, IL1B, CCL5, NLRP1	10.4701	0.0158942	0.00133427	0.223949
GOTERM_BP_FAT	GO:0032675~regulation of interleukin-6 production	4	0.52356	0.000615913	NOD1, TNF, IL1B, IL10	23.4861	0.58462	0.00700385	1.01225
GOTERM_BP_FAT	GO:0043410~positive regulation of MAPKKK cascade	4	0.52356	0.00143387	NOD1, TNF, IL1B, TGFB2	17.6146	0.870771	0.0146128	2.3417
GOTERM_BP_FAT	GO:0043408~regulation of MAPKKK cascade	5	0.65445	0.0016486	NOD1, TNF, IL1B, TIMP2, TGFB2	9.6961	0.904901	0.0164328	2.6879
GOTERM_BP_FAT	GO:0046330~positive regulation of JNK cascade	3	0.39267	0.00277501	NOD1, TNF, IL1B	37.3015	0.980988	0.0254034	4.48524
GOTERM_BP_FAT	GO:0032755~positive regulation of interleukin-6 production	3	0.39267	0.00346833	NOD1, TNF, IL1B	33.375	0.992948	0.03012	5.57595
GOTERM_BP_FAT	GO:0070302~regulation of stress-activated protein kinase signaling pathway	4	0.52356	0.00405261	NOD1, TNF, IL1B, TGFB2	12.2536	0.996944	0.0332972	6.48605
GOTERM_BP_FAT	GO:0080135~regulation of cellular response to stress	4	0.52356	0.0122336	NOD1, TNF, IL1B, TGFB2	8.20874	1	0.0773605	18.394
GOTERM_BP_FAT	GO:0046328~regulation of JNK cascade	3	0.39267	0.0367972	NOD1, TNF, IL1B	9.75577	1	0.181461	46.1581
Annotation Cluster 15	Enrichment Score: 3.0634515309251795
Category	Term	Count	%	PValue	Genes	Fold Enrichment	Bonferroni	Benjamini	FDR
GOTERM_BP_FAT	GO:0051240~positive regulation of multicellular organismal process	13	1.70157	1.07007e-09	TNF, IL18, SMAD3, CD40, CCL5, NFKBIL1, TGFB2, SLC11A1, NOD1, CD40LG, IL1B, LTA, CD14	11.2618	1.52592e-06	2.5432e-07	1.76708e-06
GOTERM_BP_FAT	GO:0010033~response to organic substance	19	2.48691	2.62803e-09	TNF, MSH5, TGFBR2, IL1RN, SMAD3, TIMP4, MMP3, CCL5, MMP13, IL10, TGFB2, RETN, SLC11A1, TNFRSF1A, CASP3, IL1B, ANGPT1, LTA, CD14	5.57021	3.74757e-06	4.68447e-07	4.33985e-06
GOTERM_BP_FAT	GO:0001819~positive regulation of cytokine production	9	1.17801	8.03269e-09	SLC11A1, NOD1, TNF, CD40LG, IL18, SMAD3, IL1B, CD40, CD14	21.1375	1.14545e-05	9.5455e-07	1.32649e-05
GOTERM_BP_FAT	GO:0001817~regulation of cytokine production	11	1.43979	9.92029e-09	SLC11A1, NOD1, TNF, CD40LG, IL18, SMAD3, IL1B, CD40, IL10, CD14, TGFB2	12.846	1.41462e-05	1.08818e-06	1.6382e-05
GOTERM_BP_FAT	GO:0051223~regulation of protein transport	9	1.17801	5.22727e-08	TNF, CD40LG, SMAD3, IL1B, CD40, IL10, NFKBIL1, LTA, TGFB2	16.6875	7.45381e-05	4.65879e-06	8.63214e-05
GOTERM_BP_FAT	GO:0070201~regulation of establishment of protein localization	9	1.17801	8.33163e-08	TNF, CD40LG, SMAD3, IL1B, CD40, IL10, NFKBIL1, LTA, TGFB2	15.7221	0.000118802	6.60048e-06	0.000137586
SP_PIR_KEYWORDS	lymphokine	5	0.65445	1.39209e-07	IL4, TNF, IL1B, IL10, LTA	99.56	2.6171e-05	3.27141e-06	0.000172715
GOTERM_BP_FAT	GO:0032880~regulation of protein localization	9	1.17801	2.30969e-07	TNF, CD40LG, SMAD3, IL1B, CD40, IL10, NFKBIL1, LTA, TGFB2	13.7853	0.000329308	1.6468e-05	0.000381415
GOTERM_BP_FAT	GO:0051222~positive regulation of protein transport	7	0.91623	6.39481e-07	TNF, SMAD3, IL1B, IL10, NFKBIL1, LTA, TGFB2	22.084	0.000911484	4.34229e-05	0.00105601
GOTERM_BP_FAT	GO:0008285~negative regulation of cell proliferation	12	1.57068	7.45541e-07	CASP3, TNF, CCL3L1, TGFBR2, CTLA4, SMAD3, IL1B, TIMP2, IL10, NFKBIL1, LTA, TGFB2	7.02632	0.00106258	4.62225e-05	0.00123116
GOTERM_BP_FAT	GO:0010740~positive regulation of protein kinase cascade	9	1.17801	9.91593e-07	IL4, TNFRSF1A, NOD1, TNF, IL1B, CD40, NFKBIL1, LTA, TGFB2	11.3915	0.00141301	5.43836e-05	0.00163747
GOTERM_BP_FAT	GO:0010627~regulation of protein kinase cascade	10	1.3089	2.08842e-06	IL4, TNFRSF1A, NOD1, TNF, IL1B, CD40, TIMP2, NFKBIL1, LTA, TGFB2	8.48896	0.00297366	0.000102687	0.00344869
GOTERM_BP_FAT	GO:0009719~response to endogenous stimulus	12	1.57068	2.29449e-06	RETN, TNF, IL1RN, TGFBR2, IL1B, TIMP4, ANGPT1, MMP3, CCL5, MMP13, IL10, TGFB2	6.26296	0.00326659	0.000105541	0.00378897
GOTERM_BP_FAT	GO:0048545~response to steroid hormone stimulus	9	1.17801	2.82692e-06	TNF, IL1RN, TGFBR2, IL1B, ANGPT1, CCL5, MMP13, IL10, TGFB2	9.9082	0.00402308	0.00012215	0.00466818
GOTERM_BP_FAT	GO:0043123~positive regulation of I-kappaB kinase/NF-kappaB cascade	7	0.91623	5.68115e-06	TNFRSF1A, NOD1, TNF, IL1B, CD40, NFKBIL1, LTA	15.2539	0.00806861	0.000207705	0.00938125
GOTERM_BP_FAT	GO:0002637~regulation of immunoglobulin production	5	0.65445	5.91205e-06	IL4, TNF, CD40LG, CD40, IL10	40.649	0.00839518	0.000205604	0.00976253
GOTERM_BP_FAT	GO:0009725~response to hormone stimulus	11	1.43979	6.78374e-06	RETN, TNF, IL1RN, TGFBR2, IL1B, TIMP4, ANGPT1, CCL5, MMP13, IL10, TGFB2	6.33549	0.009627	0.000224943	0.0112019
GOTERM_BP_FAT	GO:0002697~regulation of immune effector process	7	0.91623	7.18152e-06	IL4, MICB, TNF, CD40LG, IL1B, CD40, IL10	14.6498	0.0101886	0.00023272	0.0118587
GOTERM_BP_FAT	GO:0009967~positive regulation of signal transduction	10	1.3089	8.31684e-06	IL4, TNFRSF1A, NOD1, TNF, VEGFA, IL1B, CD40, NFKBIL1, LTA, TGFB2	7.16525	0.0117898	0.000263518	0.0137333
SP_PIR_KEYWORDS	macrophage	4	0.52356	9.08712e-06	SLC11A1, TNF, IL1B, LTA	92.9227	0.00170693	0.000142355	0.0112737
GOTERM_BP_FAT	GO:0043122~regulation of I-kappaB kinase/NF-kappaB cascade	7	0.91623	1.00212e-05	TNFRSF1A, NOD1, TNF, IL1B, CD40, NFKBIL1, LTA	13.8283	0.0141887	0.000285767	0.0165475
GOTERM_BP_FAT	GO:0010829~negative regulation of glucose transport	4	0.52356	1.12853e-05	TNF, IL1B, NFKBIL1, LTA	84.55	0.0159641	0.000315497	0.0186345
GOTERM_BP_FAT	GO:0010647~positive regulation of cell communication	10	1.3089	1.98744e-05	IL4, TNFRSF1A, NOD1, TNF, VEGFA, IL1B, CD40, NFKBIL1, LTA, TGFB2	6.42477	0.0279433	0.000497089	0.0328148
GOTERM_BP_FAT	GO:0008219~cell death	14	1.83246	2.15137e-05	MICB, TNF, MICA, SMAD3, NLRP1, PDCD1, NFKBIL1, TGFB2, TNFRSF1A, CASP3, NOD1, IL1B, LTA, CD14	4.11579	0.0302131	0.000519846	0.0355211
GOTERM_BP_FAT	GO:0016265~death	14	1.83246	2.3144e-05	MICB, TNF, MICA, SMAD3, NLRP1, PDCD1, NFKBIL1, TGFB2, TNFRSF1A, CASP3, NOD1, IL1B, LTA, CD14	4.08736	0.0324651	0.000540899	0.0382124
GOTERM_BP_FAT	GO:0042060~wound healing	8	1.04712	2.84223e-05	SLC11A1, CD40LG, FGB, TGFBR2, SMAD3, IL1B, CD40, TGFB2	8.8534	0.0397203	0.000643138	0.0469253
GOTERM_BP_FAT	GO:0002700~regulation of production of molecular mediator of immune response	5	0.65445	3.80067e-05	IL4, TNF, CD40LG, CD40, IL10	25.7774	0.052756	0.000796719	0.0627445
GOTERM_BP_FAT	GO:0009628~response to abiotic stimulus	10	1.3089	4.78343e-05	MICB, CASP3, MICA, TNF, IL18, TGFBR2, IL1B, MMP13, NFKBIL1, LTA	5.74389	0.0659389	0.000988111	0.0789628
GOTERM_BP_FAT	GO:0042981~regulation of apoptosis	14	1.83246	6.8697e-05	IL4, TNF, SMAD3, NLRP1, IL10, NFKBIL1, TGFB2, MIF, CASP3, NOD1, CD40LG, VEGFA, IL1B, LTA	3.68066	0.0933196	0.00134109	0.113383
GOTERM_BP_FAT	GO:0044093~positive regulation of molecular function	12	1.57068	7.26046e-05	IL4, AGTR1, SLC11A1, DAB1, NOD1, TNF, TGFBR2, SMAD3, IL1B, NLRP1, IL10, TGFB2	4.3285	0.0983581	0.00139818	0.119829
GOTERM_BP_FAT	GO:0043067~regulation of programmed cell death	14	1.83246	7.60046e-05	IL4, TNF, SMAD3, NLRP1, IL10, NFKBIL1, TGFB2, MIF, CASP3, NOD1, CD40LG, VEGFA, IL1B, LTA	3.6444	0.102719	0.00144411	0.125438
GOTERM_BP_FAT	GO:0051050~positive regulation of transport	8	1.04712	7.60456e-05	SLC11A1, TNF, SMAD3, IL1B, IL10, NFKBIL1, LTA, TGFB2	7.58296	0.102772	0.00142589	0.125505
GOTERM_BP_FAT	GO:0010941~regulation of cell death	14	1.83246	7.89147e-05	IL4, TNF, SMAD3, NLRP1, IL10, NFKBIL1, TGFB2, MIF, CASP3, NOD1, CD40LG, VEGFA, IL1B, LTA	3.63098	0.106436	0.00146045	0.130237
GOTERM_BP_FAT	GO:0033157~regulation of intracellular protein transport	5	0.65445	0.000105398	TNF, SMAD3, IL1B, IL10, NFKBIL1	19.941	0.139555	0.00192515	0.173909
GOTERM_MF_FAT	GO:0005164~tumor necrosis factor receptor binding	4	0.52356	0.000123582	TNF, CD40LG, NFKBIL1, LTA	39.8863	0.0332965	0.00843014	0.162736
GOTERM_BP_FAT	GO:0002037~negative regulation of L-glutamate transport	3	0.39267	0.000127301	TNF, NFKBIL1, LTA	158.531	0.166018	0.0021589	0.210014
GOTERM_BP_FAT	GO:0009612~response to mechanical stimulus	5	0.65445	0.000130828	TNF, TGFBR2, MMP13, NFKBIL1, LTA	18.8728	0.170202	0.00219257	0.215826
GOTERM_BP_FAT	GO:0043525~positive regulation of neuron apoptosis	4	0.52356	0.000139161	TNF, NFKBIL1, LTA, TGFB2	38.4318	0.180006	0.00230499	0.229559
GOTERM_BP_FAT	GO:0045787~positive regulation of cell cycle	5	0.65445	0.000140213	TNF, IL1B, NFKBIL1, LTA, TGFB2	18.5417	0.181234	0.00229572	0.231291
GOTERM_BP_FAT	GO:0050900~leukocyte migration	5	0.65445	0.000140213	TNF, IL1B, CCL5, IL10, TGFB2	18.5417	0.181234	0.00229572	0.231291
GOTERM_BP_FAT	GO:0060341~regulation of cellular localization	8	1.04712	0.000147525	TNF, CD40LG, SMAD3, IL1B, CD40, IL10, NFKBIL1, TGFB2	6.81855	0.189729	0.00238789	0.243339
GOTERM_BP_FAT	GO:0046822~regulation of nucleocytoplasmic transport	5	0.65445	0.000150076	TNF, SMAD3, IL1B, IL10, NFKBIL1	18.222	0.192671	0.00240188	0.247542
GOTERM_BP_FAT	GO:0043065~positive regulation of apoptosis	10	1.3089	0.000157257	CASP3, NOD1, TNF, SMAD3, IL1B, NLRP1, IL10, NFKBIL1, LTA, TGFB2	4.9157	0.200897	0.0024347	0.259372
GOTERM_BP_FAT	GO:0043068~positive regulation of programmed cell death	10	1.3089	0.00016569	CASP3, NOD1, TNF, SMAD3, IL1B, NLRP1, IL10, NFKBIL1, LTA, TGFB2	4.88164	0.210452	0.00253757	0.273264
GOTERM_BP_FAT	GO:0010942~positive regulation of cell death	10	1.3089	0.000171521	CASP3, NOD1, TNF, SMAD3, IL1B, NLRP1, IL10, NFKBIL1, LTA, TGFB2	4.8592	0.21699	0.00257153	0.282867
GOTERM_BP_FAT	GO:0051130~positive regulation of cellular component organization	7	0.91623	0.000190637	SLC11A1, TNF, SMAD3, IL1B, NFKBIL1, LTA, TGFB2	8.17472	0.23805	0.00282802	0.314347
GOTERM_BP_FAT	GO:0045840~positive regulation of mitosis	4	0.52356	0.000205778	TNF, IL1B, NFKBIL1, LTA	33.82	0.254328	0.0029901	0.339273
GOTERM_BP_FAT	GO:0051785~positive regulation of nuclear division	4	0.52356	0.000205778	TNF, IL1B, NFKBIL1, LTA	33.82	0.254328	0.0029901	0.339273
GOTERM_BP_FAT	GO:0002036~regulation of L-glutamate transport	3	0.39267	0.000211532	TNF, NFKBIL1, LTA	126.825	0.260422	0.00304259	0.348744
KEGG_PATHWAY	hsa04621:NOD-like receptor signaling pathway	6	0.78534	0.000213602	NOD1, TNF, IL18, IL1B, CCL5, NLRP1	10.4701	0.0158942	0.00133427	0.223949
GOTERM_BP_FAT	GO:0007610~behavior	10	1.3089	0.00030016	IL4, CCR5, CCL3L1, CCR3, IL18, CCR2, IL1B, CCL5, IL10, TGFB2	4.50693	0.348248	0.00399287	0.494522
GOTERM_BP_FAT	GO:0002544~chronic inflammatory response	3	0.39267	0.000316344	TNF, IL1B, CCL5	105.688	0.363123	0.00416886	0.521121
GOTERM_BP_FAT	GO:0044070~regulation of anion transport	3	0.39267	0.000316344	TNF, NFKBIL1, LTA	105.688	0.363123	0.00416886	0.521121
GOTERM_BP_FAT	GO:0051956~negative regulation of amino acid transport	3	0.39267	0.000316344	TNF, NFKBIL1, LTA	105.688	0.363123	0.00416886	0.521121
GOTERM_BP_FAT	GO:0032386~regulation of intracellular transport	5	0.65445	0.000328502	TNF, SMAD3, IL1B, IL10, NFKBIL1	14.8856	0.374073	0.00425022	0.541097
GOTERM_BP_FAT	GO:0051046~regulation of secretion	7	0.91623	0.000344473	AGTR1, TNF, CD40LG, IL1B, CD40, IL10, TGFB2	7.32488	0.388171	0.00441637	0.567333
GOTERM_BP_FAT	GO:0042990~regulation of transcription factor import into nucleus	4	0.52356	0.000357263	TNF, SMAD3, IL10, NFKBIL1	28.1833	0.399233	0.00453921	0.588341
GOTERM_MF_FAT	GO:0032813~tumor necrosis factor receptor superfamily binding	4	0.52356	0.000403931	TNF, CD40LG, NFKBIL1, LTA	27.0198	0.104792	0.0110089	0.531
GOTERM_BP_FAT	GO:0006915~apoptosis	11	1.43979	0.000428282	TNFRSF1A, CASP3, NOD1, TNF, SMAD3, IL1B, NLRP1, PDCD1, NFKBIL1, CD14, LTA	3.86233	0.457116	0.00529775	0.704906
GOTERM_BP_FAT	GO:0030155~regulation of cell adhesion	6	0.78534	0.000434422	DAB1, TNF, IL18, SMAD3, IL1B, TGFB2	9.2573	0.461851	0.00532731	0.714978
GOTERM_BP_FAT	GO:0051384~response to glucocorticoid stimulus	5	0.65445	0.000470676	TNF, IL1RN, IL1B, CCL5, IL10	13.5497	0.488978	0.00572153	0.774428
GOTERM_BP_FAT	GO:0012501~programmed cell death	11	1.43979	0.000481328	TNFRSF1A, CASP3, NOD1, TNF, SMAD3, IL1B, NLRP1, PDCD1, NFKBIL1, CD14, LTA	3.80544	0.496685	0.00575262	0.791888
GOTERM_BP_FAT	GO:0010827~regulation of glucose transport	4	0.52356	0.000519627	TNF, IL1B, NFKBIL1, LTA	24.8676	0.523449	0.00610674	0.854646
GOTERM_BP_FAT	GO:0044057~regulation of system process	8	1.04712	0.000560514	AGTR1, ACE, TNF, IL1B, IL10, NFKBIL1, LTA, TGFB2	5.47249	0.550454	0.00653199	0.921601
GOTERM_BP_FAT	GO:0051953~negative regulation of amine transport	3	0.39267	0.000586969	TNF, NFKBIL1, LTA	79.2656	0.567107	0.00678391	0.964901
GOTERM_BP_FAT	GO:0010638~positive regulation of organelle organization	5	0.65445	0.000595921	TNF, SMAD3, IL1B, NFKBIL1, LTA	12.7334	0.572601	0.00683169	0.979549
GOTERM_BP_FAT	GO:0032675~regulation of interleukin-6 production	4	0.52356	0.000615913	NOD1, TNF, IL1B, IL10	23.4861	0.58462	0.00700385	1.01225
GOTERM_BP_FAT	GO:0031960~response to corticosteroid stimulus	5	0.65445	0.000652074	TNF, IL1RN, IL1B, CCL5, IL10	12.4338	0.60551	0.00729735	1.07138
GOTERM_BP_FAT	GO:0019722~calcium-mediated signaling	4	0.52356	0.00066804	AGTR1, TNF, NFKBIL1, LTA	22.8514	0.614396	0.00741723	1.09748
GOTERM_BP_FAT	GO:0030595~leukocyte chemotaxis	4	0.52356	0.00066804	IL1B, CCL5, IL10, TGFB2	22.8514	0.614396	0.00741723	1.09748
GOTERM_BP_FAT	GO:0046325~negative regulation of glucose import	3	0.39267	0.00075241	TNF, NFKBIL1, LTA	70.4583	0.658135	0.00828595	1.23528
GOTERM_BP_FAT	GO:0060326~cell chemotaxis	4	0.52356	0.000780553	IL1B, CCL5, IL10, TGFB2	21.6795	0.671593	0.00852883	1.2812
GOTERM_BP_FAT	GO:0032891~negative regulation of organic acid transport	3	0.39267	0.000937691	TNF, NFKBIL1, LTA	63.4125	0.737571	0.0101601	1.53726
GOTERM_BP_FAT	GO:0051955~regulation of amino acid transport	3	0.39267	0.000937691	TNF, NFKBIL1, LTA	63.4125	0.737571	0.0101601	1.53726
GOTERM_BP_FAT	GO:0042306~regulation of protein import into nucleus	4	0.52356	0.00111258	TNF, SMAD3, IL10, NFKBIL1	19.2159	0.795549	0.0117766	1.82151
GOTERM_BP_FAT	GO:0048585~negative regulation of response to stimulus	5	0.65445	0.0011988	MICB, CTLA4, IL1B, IL10, TGFB2	10.5687	0.819227	0.0125905	1.96136
GOTERM_BP_FAT	GO:0051043~regulation of membrane protein ectodomain proteolysis	3	0.39267	0.00161076	TNF, IL1B, IL10	48.7788	0.89962	0.0161713	2.62698
GOTERM_BP_FAT	GO:0016477~cell migration	7	0.91623	0.0017518	DAB1, TNF, IL1B, CCL5, IL10, KDR, TGFB2	5.36096	0.917937	0.0172131	2.8539
GOTERM_BP_FAT	GO:0007088~regulation of mitosis	4	0.52356	0.00223807	TNF, IL1B, NFKBIL1, LTA	15.0982	0.959036	0.0210752	3.63241
GOTERM_BP_FAT	GO:0051783~regulation of nuclear division	4	0.52356	0.00223807	TNF, IL1B, NFKBIL1, LTA	15.0982	0.959036	0.0210752	3.63241
GOTERM_BP_FAT	GO:0045785~positive regulation of cell adhesion	4	0.52356	0.00272662	TNF, SMAD3, IL1B, TGFB2	14.0917	0.979625	0.0251265	4.40867
GOTERM_BP_FAT	GO:0051091~positive regulation of transcription factor activity	4	0.52356	0.00272662	IL4, TNF, IL1B, IL10	14.0917	0.979625	0.0251265	4.40867
GOTERM_BP_FAT	GO:0032890~regulation of organic acid transport	3	0.39267	0.00277501	TNF, NFKBIL1, LTA	37.3015	0.980988	0.0254034	4.48524
GOTERM_BP_FAT	GO:0048870~cell motility	7	0.91623	0.00298431	DAB1, TNF, IL1B, CCL5, IL10, KDR, TGFB2	4.81963	0.985906	0.0267812	4.81574
GOTERM_BP_FAT	GO:0051674~localization of cell	7	0.91623	0.00298431	DAB1, TNF, IL1B, CCL5, IL10, KDR, TGFB2	4.81963	0.985906	0.0267812	4.81574
GOTERM_BP_FAT	GO:0051235~maintenance of location	4	0.52356	0.00327622	TNF, IL1B, IL10, NFKBIL1	13.2109	0.990717	0.0286473	5.27492
GOTERM_BP_FAT	GO:0051051~negative regulation of transport	5	0.65445	0.00358421	TNF, IL1B, IL10, NFKBIL1, LTA	7.8287	0.994026	0.0305554	5.75712
GOTERM_BP_FAT	GO:0006917~induction of apoptosis	7	0.91623	0.00366008	CASP3, NOD1, TNF, SMAD3, NLRP1, NFKBIL1, LTA	4.62383	0.99464	0.0310081	5.87554
GOTERM_BP_FAT	GO:0012502~induction of programmed cell death	7	0.91623	0.00371641	CASP3, NOD1, TNF, SMAD3, NLRP1, NFKBIL1, LTA	4.60942	0.995055	0.0312932	5.96339
GOTERM_BP_FAT	GO:0043388~positive regulation of DNA binding	4	0.52356	0.00422015	IL4, TNF, IL1B, IL10	12.0786	0.997596	0.0342587	6.74547
GOTERM_BP_FAT	GO:0051726~regulation of cell cycle	7	0.91623	0.00431596	CASP3, TNF, SMAD3, IL1B, NFKBIL1, LTA, TGFB2	4.47017	0.997904	0.0348267	6.89354
GOTERM_BP_FAT	GO:0046824~positive regulation of nucleocytoplasmic transport	3	0.39267	0.0046434	TNF, SMAD3, IL1B	28.8239	0.998689	0.0370075	7.39788
GOTERM_BP_FAT	GO:0043271~negative regulation of ion transport	3	0.39267	0.00507043	TNF, NFKBIL1, LTA	27.5707	0.999289	0.0399057	8.05177
GOTERM_BP_FAT	GO:0007346~regulation of mitotic cell cycle	5	0.65445	0.00545955	TNF, SMAD3, IL1B, NFKBIL1, LTA	6.95312	0.999593	0.0419867	8.64382
GOTERM_BP_FAT	GO:0051098~regulation of binding	5	0.65445	0.00558683	IL4, TNF, SMAD3, IL1B, IL10	6.90768	0.999661	0.0424902	8.83669
GOTERM_BP_FAT	GO:0051099~positive regulation of binding	4	0.52356	0.00571257	IL4, TNF, IL1B, IL10	10.8397	0.999717	0.0431985	9.02687
GOTERM_BP_FAT	GO:0010604~positive regulation of macromolecule metabolic process	11	1.43979	0.00590814	IL4, AGTR1, TNFRSF1A, SLC11A1, TNF, VEGFA, SMAD3, IL1B, CD40, IL10, TGFB2	2.7131	0.999786	0.0441814	9.32192
GOTERM_BP_FAT	GO:0051353~positive regulation of oxidoreductase activity	3	0.39267	0.00645525	AGTR1, TNF, IL1B	24.3894	0.999902	0.047443	10.1425
GOTERM_MF_FAT	GO:0008083~growth factor activity	5	0.65445	0.00687029	IL4, VEGFA, IL1B, IL10, TGFB2	6.50321	0.84877	0.111357	8.68455
GOTERM_BP_FAT	GO:0045428~regulation of nitric oxide biosynthetic process	3	0.39267	0.00695087	TNF, IL1B, IL10	23.4861	0.999952	0.050231	10.8799
GOTERM_BP_FAT	GO:0043523~regulation of neuron apoptosis	4	0.52356	0.00848048	TNF, NFKBIL1, LTA, TGFB2	9.39444	0.999995	0.0583508	13.1199
GOTERM_BP_FAT	GO:0032388~positive regulation of intracellular transport	3	0.39267	0.00853751	TNF, SMAD3, IL1B	21.1375	0.999995	0.0584524	13.2024
BIOCARTA	h_nthiPathway:NFkB activation by Nontypeable Hemophilus influenzae	4	0.52356	0.00920851	TNF, TGFBR2, SMAD3, IL1B	8.55357	0.471827	0.147501	9.10451
GOTERM_BP_FAT	GO:0046324~regulation of glucose import	3	0.39267	0.0102705	TNF, NFKBIL1, LTA	19.2159	1	0.0670845	15.674
GOTERM_BP_FAT	GO:0051952~regulation of amine transport	3	0.39267	0.0102705	TNF, NFKBIL1, LTA	19.2159	1	0.0670845	15.674
GOTERM_BP_FAT	GO:0050806~positive regulation of synaptic transmission	3	0.39267	0.0108799	TNF, NFKBIL1, LTA	18.6507	1	0.0699872	16.5274
GOTERM_BP_FAT	GO:0051090~regulation of transcription factor activity	4	0.52356	0.0122336	IL4, TNF, IL1B, IL10	8.20874	1	0.0773605	18.394
KEGG_PATHWAY	hsa04620:Toll-like receptor signaling pathway	5	0.65445	0.0126326	TNF, IL1B, CD40, CCL5, CD14	5.35601	0.614603	0.0615873	12.4906
GOTERM_BP_FAT	GO:0009895~negative regulation of catabolic process	3	0.39267	0.0128013	TNF, IL1B, IL10	17.1385	1	0.0801196	19.1651
GOTERM_BP_FAT	GO:0051971~positive regulation of transmission of nerve impulse	3	0.39267	0.0128013	TNF, NFKBIL1, LTA	17.1385	1	0.0801196	19.1651
GOTERM_BP_FAT	GO:0031646~positive regulation of neurological system process	3	0.39267	0.0141584	TNF, NFKBIL1, LTA	16.2596	1	0.0871509	20.9807
GOTERM_BP_FAT	GO:0051224~negative regulation of protein transport	3	0.39267	0.0148593	TNF, IL10, NFKBIL1	15.8531	1	0.0909047	21.9034
GOTERM_BP_FAT	GO:0051341~regulation of oxidoreductase activity	3	0.39267	0.0148593	AGTR1, TNF, IL1B	15.8531	1	0.0909047	21.9034
GOTERM_BP_FAT	GO:0006916~anti-apoptosis	5	0.65445	0.0154603	TNF, CD40LG, VEGFA, IL1B, IL10	5.13046	1	0.093634	22.6864
GOTERM_BP_FAT	GO:0050714~positive regulation of protein secretion	3	0.39267	0.015575	TNF, IL10, TGFB2	15.4665	1	0.0939047	22.835
GOTERM_BP_FAT	GO:0010564~regulation of cell cycle process	4	0.52356	0.016046	TNF, IL1B, NFKBIL1, LTA	7.41667	1	0.0962224	23.4425
GOTERM_BP_FAT	GO:0033043~regulation of organelle organization	5	0.65445	0.0183603	TNF, SMAD3, IL1B, NFKBIL1, LTA	4.87039	1	0.107654	26.3624
GOTERM_BP_FAT	GO:0051101~regulation of DNA binding	4	0.52356	0.0187825	IL4, TNF, IL1B, IL10	6.9876	1	0.109565	26.8836
GOTERM_BP_FAT	GO:0045834~positive regulation of lipid metabolic process	3	0.39267	0.0193688	AGTR1, TNF, IL1B	13.7853	1	0.112363	27.6018
GOTERM_BP_FAT	GO:0006928~cell motion	7	0.91623	0.02282	DAB1, TNF, IL1B, CCL5, IL10, KDR, TGFB2	3.115	1	0.127673	31.6964
GOTERM_BP_FAT	GO:0019932~second-messenger-mediated signaling	5	0.65445	0.0237973	AGTR1, TNF, CCR3, NFKBIL1, LTA	4.49734	1	0.130803	32.8159
GOTERM_BP_FAT	GO:0042176~regulation of protein catabolic process	3	0.39267	0.024377	TNF, IL1B, IL10	12.1947	1	0.132794	33.4716
GOTERM_BP_FAT	GO:0030162~regulation of proteolysis	3	0.39267	0.025258	TNF, IL1B, IL10	11.9646	1	0.136282	34.4568
SP_PIR_KEYWORDS	lipoprotein	7	0.91623	0.0257571	AGTR1, TNF, CCR5, BLK, IL1B, FCGR3B, CD14	3.03953	0.992596	0.130786	27.6571
GOTERM_BP_FAT	GO:0051048~negative regulation of secretion	3	0.39267	0.0270586	TNF, IL1B, IL10	11.5295	1	0.143254	36.4278
GOTERM_BP_FAT	GO:0007242~intracellular signaling cascade	12	1.57068	0.0291347	AGTR1, DAB1, NOD1, TNF, CCR3, CD209, BLK, CCR2, IL1B, IL10, NFKBIL1, LTA	2.01951	1	0.151309	38.6312
GOTERM_BP_FAT	GO:0031329~regulation of cellular catabolic process	3	0.39267	0.0327588	TNF, IL1B, IL10	10.3955	1	0.166964	42.3066
GOTERM_BP_FAT	GO:0031644~regulation of neurological system process	4	0.52356	0.0343986	TNF, IL10, NFKBIL1, LTA	5.52614	1	0.172871	43.9007
GOTERM_BP_FAT	GO:0031328~positive regulation of cellular biosynthetic process	8	1.04712	0.0392865	IL4, TNFRSF1A, SLC11A1, TNF, VEGFA, SMAD3, IL1B, IL10	2.46861	1	0.19141	48.4105
KEGG_PATHWAY	hsa04640:Hematopoietic cell lineage	4	0.52356	0.0420864	IL4, TNF, IL1B, CD14	5.03216	0.960237	0.148913	36.3176
SP_PIR_KEYWORDS	Apoptosis	5	0.65445	0.0458611	TNFRSF1A, CASP3, NOD1, NLRP1, PDCD1	3.65837	0.999853	0.20726	44.1474
GOTERM_BP_FAT	GO:0042035~regulation of cytokine biosynthetic process	3	0.39267	0.0465338	TNF, IL1B, IL10	8.56926	1	0.220345	54.4746
GOTERM_BP_FAT	GO:0007267~cell-cell signaling	7	0.91623	0.0598218	CCR5, IL18, IL1B, CCL5, IL10, LTA, TGFB2	2.46604	1	0.271245	63.8921
GOTERM_BP_FAT	GO:0001934~positive regulation of protein amino acid phosphorylation	3	0.39267	0.0645639	IL4, TNF, IL1B	7.125	1	0.287304	66.7848
BIOCARTA	h_stressPathway:TNF/Stress Related Signaling	3	0.39267	0.0728091	TNFRSF1A, TNF, LTA	6.41518	0.994572	0.43986	54.1616
GOTERM_BP_FAT	GO:0009894~regulation of catabolic process	3	0.39267	0.0736605	TNF, IL1B, IL10	6.60547	1	0.317165	71.7347
GOTERM_BP_FAT	GO:0042327~positive regulation of phosphorylation	3	0.39267	0.0749923	IL4, TNF, IL1B	6.53737	1	0.321127	72.3983
GOTERM_BP_FAT	GO:0043269~regulation of ion transport	3	0.39267	0.077679	TNF, NFKBIL1, LTA	6.4053	1	0.327163	73.6928
GOTERM_BP_FAT	GO:0045937~positive regulation of phosphate metabolic process	3	0.39267	0.0790338	IL4, TNF, IL1B	6.34125	1	0.331068	74.3237
GOTERM_BP_FAT	GO:0010562~positive regulation of phosphorus metabolic process	3	0.39267	0.0790338	IL4, TNF, IL1B	6.34125	1	0.331068	74.3237
GOTERM_BP_FAT	GO:0051047~positive regulation of secretion	3	0.39267	0.0915512	TNF, IL10, TGFB2	5.81766	1	0.368377	79.5173
GOTERM_BP_FAT	GO:0007243~protein kinase cascade	5	0.65445	0.0934976	TNF, BLK, CCR2, IL1B, IL10	2.85642	1	0.373844	80.2301
GOTERM_BP_FAT	GO:0032270~positive regulation of cellular protein metabolic process	4	0.52356	0.0945733	IL4, AGTR1, TNF, IL1B	3.62876	1	0.376395	80.6139
GOTERM_BP_FAT	GO:0019216~regulation of lipid metabolic process	3	0.39267	0.0958463	AGTR1, TNF, IL1B	5.66183	1	0.379566	81.0592
BIOCARTA	h_il1rPathway:Signal transduction through IL1R	3	0.39267	0.101172	TNF, IL1RN, IL1B	5.30911	0.999364	0.520965	66.7339
GOTERM_BP_FAT	GO:0051247~positive regulation of protein metabolic process	4	0.52356	0.103974	IL4, AGTR1, TNF, IL1B	3.47942	1	0.403503	83.6831
GOTERM_BP_FAT	GO:0050804~regulation of synaptic transmission	3	0.39267	0.132076	TNF, NFKBIL1, LTA	4.66268	1	0.477692	90.3593
GOTERM_BP_FAT	GO:0051969~regulation of transmission of nerve impulse	3	0.39267	0.149597	TNF, NFKBIL1, LTA	4.31378	1	0.516475	93.1159
GOTERM_BP_FAT	GO:0032268~regulation of cellular protein metabolic process	5	0.65445	0.178889	IL4, AGTR1, TNF, IL1B, IL10	2.22969	1	0.579987	96.1411
GOTERM_BP_FAT	GO:0001932~regulation of protein amino acid phosphorylation	3	0.39267	0.192611	IL4, TNF, IL1B	3.66546	1	0.607754	97.0786
GOTERM_BP_FAT	GO:0031401~positive regulation of protein modification process	3	0.39267	0.216415	IL4, TNF, IL1B	3.39104	1	0.651404	98.2178
GOTERM_BP_FAT	GO:0008104~protein localization	6	0.78534	0.392818	SLC11A1, TNF, CD40LG, IL10, NFKBIL1, TGFB2	1.43793	1	0.878147	99.9736
GOTERM_BP_FAT	GO:0031399~regulation of protein modification process	3	0.39267	0.400813	IL4, TNF, IL1B	2.14958	1	0.884037	99.9788
Annotation Cluster 16	Enrichment Score: 3.0055755609283983
Category	Term	Count	%	PValue	Genes	Fold Enrichment	Bonferroni	Benjamini	FDR
GOTERM_BP_FAT	GO:0055066~di-, tri-valent inorganic cation homeostasis	10	1.3089	1.48818e-06	AGTR1, SLC11A1, CCR5, CCR3, CCR2, IL1B, HP, ITPR3, CCL5, KDR	8.84414	0.0021199	7.57883e-05	0.00245751
GOTERM_BP_FAT	GO:0055065~metal ion homeostasis	9	1.17801	4.59762e-06	AGTR1, SLC11A1, CCR5, CCR3, CCR2, IL1B, ITPR3, CCL5, KDR	9.27988	0.00653478	0.000187303	0.00759209
GOTERM_BP_FAT	GO:0055080~cation homeostasis	10	1.3089	6.47646e-06	AGTR1, SLC11A1, CCR5, CCR3, CCR2, IL1B, HP, ITPR3, CCL5, KDR	7.39073	0.00919294	0.000219868	0.0106945
GOTERM_BP_FAT	GO:0006968~cellular defense response	6	0.78534	9.07174e-06	IL4, CCR5, CCR3, CCR2, CCL5, HLA-G	20.791	0.012853	0.000275204	0.0149797
GOTERM_BP_FAT	GO:0030005~cellular di-, tri-valent inorganic cation homeostasis	9	1.17801	9.72428e-06	AGTR1, SLC11A1, CCR5, CCR3, CCR2, IL1B, HP, ITPR3, CCL5	8.38051	0.0137712	0.000288852	0.0160572
GOTERM_BP_FAT	GO:0030003~cellular cation homeostasis	9	1.17801	2.19529e-05	AGTR1, SLC11A1, CCR5, CCR3, CCR2, IL1B, HP, ITPR3, CCL5	7.48967	0.0308202	0.000521616	0.0362461
GOTERM_BP_FAT	GO:0055074~calcium ion homeostasis	8	1.04712	2.56734e-05	AGTR1, CCR5, CCR3, CCR2, IL1B, ITPR3, CCL5, KDR	8.99468	0.0359487	0.000590321	0.0423878
GOTERM_BP_FAT	GO:0006875~cellular metal ion homeostasis	8	1.04712	3.35409e-05	AGTR1, SLC11A1, CCR5, CCR3, CCR2, IL1B, ITPR3, CCL5	8.62755	0.0467043	0.000747067	0.055374
GOTERM_BP_FAT	GO:0050801~ion homeostasis	10	1.3089	0.000107694	AGTR1, SLC11A1, CCR5, CCR3, CCR2, IL1B, HP, ITPR3, CCL5, KDR	5.16809	0.142368	0.00194217	0.177695
GOTERM_BP_FAT	GO:0048878~chemical homeostasis	11	1.43979	0.000116069	AGTR1, SLC11A1, CCR5, CCR3, VEGFA, CCR2, IL1B, HP, ITPR3, CCL5, KDR	4.54126	0.15255	0.0020669	0.191499
GOTERM_BP_FAT	GO:0042592~homeostatic process	13	1.70157	0.000152854	HP, ITPR3, CCL5, KDR, SLC11A1, AGTR1, CASP3, CCR5, CCR3, CCR2, VEGFA, IL1B, COL11A2	3.65895	0.195863	0.00241914	0.252119
GOTERM_MF_FAT	GO:0019955~cytokine binding	6	0.78534	0.000155697	AGTR1, TNFRSF1A, CCR5, CCR3, CCR2, TGFBR2	11.5268	0.041767	0.00849656	0.204986
GOTERM_BP_FAT	GO:0007204~elevation of cytosolic calcium ion concentration	6	0.78534	0.000156695	AGTR1, CCR5, CCR3, CCR2, IL1B, ITPR3	11.5295	0.200257	0.00245264	0.258447
GOTERM_BP_FAT	GO:0006874~cellular calcium ion homeostasis	7	0.91623	0.000202353	AGTR1, CCR5, CCR3, CCR2, IL1B, ITPR3, CCL5	8.08538	0.250677	0.00297068	0.333635
GOTERM_MF_FAT	GO:0004950~chemokine receptor activity	4	0.52356	0.000210871	AGTR1, CCR5, CCR3, CCR2	33.5045	0.056147	0.00958458	0.277533
GOTERM_BP_FAT	GO:0051480~cytosolic calcium ion homeostasis	6	0.78534	0.000217707	AGTR1, CCR5, CCR3, CCR2, IL1B, ITPR3	10.7479	0.266908	0.00310002	0.358907
GOTERM_MF_FAT	GO:0019956~chemokine binding	4	0.52356	0.000266386	AGTR1, CCR5, CCR3, CCR2	31.0227	0.0703986	0.0103743	0.350478
GOTERM_BP_FAT	GO:0006873~cellular ion homeostasis	9	1.17801	0.00032489	AGTR1, SLC11A1, CCR5, CCR3, CCR2, IL1B, HP, ITPR3, CCL5	5.08656	0.370839	0.00424206	0.535163
GOTERM_BP_FAT	GO:0055082~cellular chemical homeostasis	9	1.17801	0.000361463	AGTR1, SLC11A1, CCR5, CCR3, CCR2, IL1B, HP, ITPR3, CCL5	5.00625	0.402822	0.00455191	0.595238
GOTERM_MF_FAT	GO:0042277~peptide binding	7	0.91623	0.000368441	AGTR1, ACE, CCR5, CCR3, CD209, CCR2, HLA-DOB	7.2208	0.0960412	0.0111564	0.48445
GOTERM_BP_FAT	GO:0019725~cellular homeostasis	9	1.17801	0.00137035	AGTR1, SLC11A1, CCR5, CCR3, CCR2, IL1B, HP, ITPR3, CCL5	4.08235	0.8585	0.01407	2.23905
INTERPRO	IPR000355:Chemokine receptor	3	0.39267	0.00184382	CCR5, CCR3, CCR2	45.9347	0.271983	0.024122	2.2307
GOTERM_MF_FAT	GO:0016493~C-C chemokine receptor activity	3	0.39267	0.00249766	CCR5, CCR3, CCR2	39.2631	0.496018	0.0477655	3.24186
GOTERM_MF_FAT	GO:0019957~C-C chemokine binding	3	0.39267	0.00249766	CCR5, CCR3, CCR2	39.2631	0.496018	0.0477655	3.24186
SP_PIR_KEYWORDS	G protein-coupled receptor	4	0.52356	0.00805747	AGTR1, CCR5, CCR3, CCR2	9.61269	0.781494	0.0478784	9.55
PIR_SUPERFAMILY	PIRSF038545:chemokine receptor	3	0.39267	0.0102372	CCR5, CCR3, CCR2	19.0292	0.414375	0.125208	9.51385
GOTERM_MF_FAT	GO:0001653~peptide receptor activity	4	0.52356	0.016408	AGTR1, CCR5, CCR3, CCR2	7.34748	0.989253	0.202804	19.5891
GOTERM_MF_FAT	GO:0008528~peptide receptor activity, G-protein coupled	4	0.52356	0.016408	AGTR1, CCR5, CCR3, CCR2	7.34748	0.989253	0.202804	19.5891
KEGG_PATHWAY	hsa04062:Chemokine signaling pathway	5	0.65445	0.0873655	CCR5, CCL3L1, CCR3, CCR2, CCL5	2.89282	0.998947	0.248502	61.6898
SP_PIR_KEYWORDS	g-protein coupled receptor	4	0.52356	0.555316	AGTR1, CCR5, CCR3, CCR2	1.36651	1	0.940475	99.9957
INTERPRO	IPR017452:GPCR, rhodopsin-like superfamily	4	0.52356	0.563752	AGTR1, CCR5, CCR3, CCR2	1.34978	1	0.999203	99.9961
INTERPRO	IPR000276:7TM GPCR, rhodopsin-like	4	0.52356	0.564699	AGTR1, CCR5, CCR3, CCR2	1.34792	1	0.9989	99.9962
SP_PIR_KEYWORDS	transducer	4	0.52356	0.602544	AGTR1, CCR5, CCR3, CCR2	1.27583	1	0.957313	99.9989
GOTERM_BP_FAT	GO:0007186~G-protein coupled receptor protein signaling pathway	6	0.78534	0.608268	AGTR1, CCR5, CCR3, CCR2, ITPR3, CCL5	1.12934	1	0.976822	100
PIR_SUPERFAMILY	PIRSF800006:rhodopsin-like G protein-coupled receptors	4	0.52356	0.873086	AGTR1, CCR5, CCR3, CCR2	0.813686	1	1	100
Annotation Cluster 17	Enrichment Score: 2.945774715300082
Category	Term	Count	%	PValue	Genes	Fold Enrichment	Bonferroni	Benjamini	FDR
GOTERM_BP_FAT	GO:0032101~regulation of response to external stimulus	8	1.04712	8.6464e-06	AGTR1, TNFRSF1A, VEGFA, TGFBR2, SMAD3, CCL5, IL10, KDR	10.6352	0.0122541	0.000268004	0.0142774
GOTERM_BP_FAT	GO:0032103~positive regulation of response to external stimulus	6	0.78534	1.15025e-05	AGTR1, TNFRSF1A, VEGFA, SMAD3, CCL5, KDR	19.8164	0.0162689	0.000315387	0.0189932
GOTERM_BP_FAT	GO:0031349~positive regulation of defense response	4	0.52356	0.00474781	AGTR1, TNFRSF1A, MICA, CCL5	11.5822	0.998871	0.0376161	7.55817
GOTERM_BP_FAT	GO:0050727~regulation of inflammatory response	4	0.52356	0.0053137	AGTR1, TNFRSF1A, CCL5, IL10	11.125	0.999498	0.0411066	8.42233
GOTERM_BP_FAT	GO:0050729~positive regulation of inflammatory response	3	0.39267	0.00853751	AGTR1, TNFRSF1A, CCL5	21.1375	0.999995	0.0584524	13.2024
GOTERM_BP_FAT	GO:0032844~regulation of homeostatic process	3	0.39267	0.0987416	AGTR1, VEGFA, CCL5	5.5625	1	0.387925	82.0363
Annotation Cluster 18	Enrichment Score: 2.909173220077235
Category	Term	Count	%	PValue	Genes	Fold Enrichment	Bonferroni	Benjamini	FDR
GOTERM_BP_FAT	GO:0050778~positive regulation of immune response	7	0.91623	5.61883e-05	MBL2, SLC11A1, MICB, MICA, CRP, IL1B, TGFB2	10.2043	0.0770006	0.00111225	0.0927471
GOTERM_BP_FAT	GO:0002252~immune effector process	5	0.65445	0.00349005	MBL2, SLC11A1, MICA, CD40LG, CRP	7.88713	0.993164	0.0301229	5.60993
GOTERM_BP_FAT	GO:0002253~activation of immune response	4	0.52356	0.00955	MBL2, MICB, MICA, CRP	8.99468	0.999999	0.0636699	14.6546
Annotation Cluster 19	Enrichment Score: 2.857982783563011
Category	Term	Count	%	PValue	Genes	Fold Enrichment	Bonferroni	Benjamini	FDR
GOTERM_BP_FAT	GO:0006968~cellular defense response	6	0.78534	9.07174e-06	IL4, CCR5, CCR3, CCR2, CCL5, HLA-G	20.791	0.012853	0.000275204	0.0149797
BIOCARTA	h_nktPathway:Selective expression of chemokine receptors during T-cell polarization	4	0.52356	0.0103338	IL4, CCR5, CD40LG, CCR3	8.21143	0.511659	0.133548	10.1641
BBID	15.T-cell_polarization-chemokine_receptors	4	0.52356	0.0284513	IL4, CCR5, CCR3, CD40	5.26471	0.763827	0.30288	24.2703
Annotation Cluster 20	Enrichment Score: 2.8498863959850196
Category	Term	Count	%	PValue	Genes	Fold Enrichment	Bonferroni	Benjamini	FDR
GOTERM_MF_FAT	GO:0005164~tumor necrosis factor receptor binding	4	0.52356	0.000123582	TNF, CD40LG, NFKBIL1, LTA	39.8863	0.0332965	0.00843014	0.162736
GOTERM_MF_FAT	GO:0032813~tumor necrosis factor receptor superfamily binding	4	0.52356	0.000403931	TNF, CD40LG, NFKBIL1, LTA	27.0198	0.104792	0.0110089	0.531
INTERPRO	IPR006052:Tumor Necrosis Factor	3	0.39267	0.00208425	TNF, CD40LG, LTA	43.2327	0.301532	0.0253075	2.51818
SMART	SM00207:TNF	3	0.39267	0.00383468	TNF, CD40LG, LTA	31.4152	0.145744	0.0310137	3.47394
INTERPRO	IPR008983:Tumour necrosis factor-like	3	0.39267	0.0141133	TNF, CD40LG, LTA	16.3324	0.913254	0.141697	15.9492
Annotation Cluster 21	Enrichment Score: 2.7729243612942542
Category	Term	Count	%	PValue	Genes	Fold Enrichment	Bonferroni	Benjamini	FDR
GOTERM_MF_FAT	GO:0043498~cell surface binding	4	0.52356	0.000330559	MBL2, FGB, VEGFA, CRP	28.8832	0.0866063	0.0112597	0.434741
SP_PIR_KEYWORDS	liver	4	0.52356	0.00119239	MBL2, FGB, CRP, HP	18.8995	0.200926	0.0123839	1.46936
SP_PIR_KEYWORDS	plasma	4	0.52356	0.00436976	MBL2, FGB, CRP, HP	11.99	0.561026	0.0311699	5.28842
SP_PIR_KEYWORDS	acute phase	3	0.39267	0.00470087	MBL2, CRP, HP	28.8381	0.587636	0.0322768	5.67847
Annotation Cluster 22	Enrichment Score: 2.699885500130812
Category	Term	Count	%	PValue	Genes	Fold Enrichment	Bonferroni	Benjamini	FDR
UP_SEQ_FEATURE	metal ion-binding site:Zinc 2; catalytic	5	0.65445	1.42774e-07	ACE, MMP3, MMP13, MMP12, MMP11	98.9286	4.66859e-05	1.16717e-05	0.000193294
SP_PIR_KEYWORDS	metalloproteinase	5	0.65445	1.43892e-06	ACE, MMP3, MMP13, MMP12, MMP11	58.0767	0.000270481	3.0057e-05	0.00178524
UP_SEQ_FEATURE	metal ion-binding site:Zinc 2; in inhibited form	4	0.52356	5.07725e-06	MMP3, MMP13, MMP12, MMP11	110.8	0.00165889	0.000237152	0.00687362
INTERPRO	IPR006025:Peptidase M, neutral zinc metallopeptidases, zinc-binding site	6	0.78534	4.16584e-05	ACE, ERAP1, MMP3, MMP13, MMP12, MMP11	15.3116	0.00713978	0.00119352	0.050911
INTERPRO	IPR016293:Peptidase M10A, matrix metallopeotidase	4	0.52356	4.85928e-05	MMP3, MMP13, MMP12, MMP11	54.4412	0.00832334	0.00119331	0.0593833
UP_SEQ_FEATURE	domain:Hemopexin-like 4	4	0.52356	6.31943e-05	MMP3, MMP13, MMP12, MMP11	50.3636	0.0204531	0.0022935	0.0855218
UP_SEQ_FEATURE	domain:Hemopexin-like 3	4	0.52356	6.31943e-05	MMP3, MMP13, MMP12, MMP11	50.3636	0.0204531	0.0022935	0.0855218
UP_SEQ_FEATURE	domain:Hemopexin-like 2	4	0.52356	7.24885e-05	MMP3, MMP13, MMP12, MMP11	48.1739	0.0234258	0.00236765	0.0980941
UP_SEQ_FEATURE	domain:Hemopexin-like 1	4	0.52356	7.24885e-05	MMP3, MMP13, MMP12, MMP11	48.1739	0.0234258	0.00236765	0.0980941
INTERPRO	IPR018487:Hemopexin/matrixin, repeat	4	0.52356	0.000103956	MMP3, MMP13, MMP12, MMP11	42.6061	0.0177224	0.00223267	0.127001
INTERPRO	IPR018486:Hemopexin/matrixin, conserved site	4	0.52356	0.000103956	MMP3, MMP13, MMP12, MMP11	42.6061	0.0177224	0.00223267	0.127001
INTERPRO	IPR000585:Hemopexin/matrixin	4	0.52356	0.000103956	MMP3, MMP13, MMP12, MMP11	42.6061	0.0177224	0.00223267	0.127001
SP_PIR_KEYWORDS	metalloprotease	6	0.78534	0.000195323	ACE, ERAP1, MMP3, MMP13, MMP12, MMP11	11.0769	0.0360581	0.00282095	0.242065
INTERPRO	IPR006026:Peptidase, metallopeptidases	4	0.52356	0.000210816	MMP3, MMP13, MMP12, MMP11	33.7911	0.0356145	0.00402125	0.257395
GOTERM_BP_FAT	GO:0044243~multicellular organismal catabolic process	4	0.52356	0.000231847	ACE, MMP3, MMP13, MMP11	32.5192	0.281545	0.00323644	0.382177
GOTERM_CC_FAT	GO:0031012~extracellular matrix	9	1.17801	0.000246338	VEGFA, TIMP4, MMP3, COL11A2, TIMP2, MMP13, MMP12, TGFB2, MMP11	5.29275	0.0308044	0.00390347	0.285308
PIR_SUPERFAMILY	PIRSF001191:Peptidase_M10A_matrix	4	0.52356	0.000248318	MMP3, MMP13, MMP12, MMP11	31.0105	0.0128311	0.00643626	0.240996
SMART	SM00120:HX	4	0.52356	0.000257579	MMP3, MMP13, MMP12, MMP11	30.9599	0.0105065	0.00526713	0.236792
UP_SEQ_FEATURE	metal ion-binding site:Calcium 4; via carbonyl oxygen	3	0.39267	0.00025892	MMP3, MMP13, MMP12	118.714	0.0811917	0.00766842	0.349971
GOTERM_BP_FAT	GO:0044259~multicellular organismal macromolecule metabolic process	4	0.52356	0.000394231	ACE, MMP3, MMP13, MMP11	27.2742	0.430095	0.00492018	0.649034
UP_SEQ_FEATURE	short sequence motif:Cysteine switch	4	0.52356	0.000480065	MMP3, MMP13, MMP12, MMP11	25.7674	0.145312	0.0104133	0.647984
SMART	SM00235:ZnMc	4	0.52356	0.000519231	MMP3, MMP13, MMP12, MMP11	24.5544	0.0210689	0.00707287	0.476816
UP_SEQ_FEATURE	metal ion-binding site:Calcium 1	4	0.52356	0.000549193	CRP, MMP3, MMP13, MMP12	24.6222	0.164425	0.0111644	0.740972
GOTERM_BP_FAT	GO:0044236~multicellular organismal metabolic process	4	0.52356	0.00066804	ACE, MMP3, MMP13, MMP11	22.8514	0.614396	0.00741723	1.09748
INTERPRO	IPR001818:Peptidase M10A and M12B, matrixin and adamalysin	4	0.52356	0.000683947	MMP3, MMP13, MMP12, MMP11	22.7893	0.111019	0.0106411	0.83285
GOTERM_CC_FAT	GO:0005578~proteinaceous extracellular matrix	8	1.04712	0.000871606	VEGFA, TIMP4, MMP3, COL11A2, TIMP2, MMP13, MMP12, MMP11	5.07222	0.10483	0.010017	1.00615
UP_SEQ_FEATURE	metal ion-binding site:Calcium 2	4	0.52356	0.000989917	CRP, MMP3, MMP13, MMP12	20.1455	0.276651	0.0188705	1.33192
SP_PIR_KEYWORDS	collagen degradation	3	0.39267	0.00161833	MMP3, MMP13, MMP11	49.1944	0.262502	0.0158982	1.98941
SP_PIR_KEYWORDS	extracellular matrix	6	0.78534	0.00162487	MMP3, COL11A2, TIMP2, MMP13, MMP12, MMP11	6.94029	0.26341	0.0151699	1.99738
GOTERM_MF_FAT	GO:0008237~metallopeptidase activity	6	0.78534	0.00165514	ACE, ERAP1, MMP3, MMP13, MMP12, MMP11	6.86568	0.364844	0.0371173	2.15933
UP_SEQ_FEATURE	propeptide:Activation peptide	4	0.52356	0.00224219	MMP3, MMP13, MMP12, MMP11	15.1781	0.520025	0.0399586	2.99329
UP_SEQ_FEATURE	metal ion-binding site:Zinc 1	4	0.52356	0.00233103	MMP3, MMP13, MMP12, MMP11	14.973	0.533798	0.037438	3.11016
UP_SEQ_FEATURE	metal ion-binding site:Calcium 3; via carbonyl oxygen	3	0.39267	0.00250721	MMP3, MMP13, MMP12	39.5714	0.559959	0.0383357	3.34155
INTERPRO	IPR002477:Peptidoglycan binding-like	3	0.39267	0.00288926	MMP3, MMP13, MMP12	36.7478	0.392055	0.0326337	3.4751
GOTERM_BP_FAT	GO:0030574~collagen catabolic process	3	0.39267	0.00384217	MMP3, MMP13, MMP11	31.7062	0.99587	0.0319603	6.15921
SP_PIR_KEYWORDS	zymogen	5	0.65445	0.00609824	CASP3, MMP3, MMP13, MMP12, MMP11	6.76622	0.683357	0.0388785	7.30835
SP_PIR_KEYWORDS	Protease	7	0.91623	0.00722243	ACE, CASP3, ERAP1, MMP3, MMP13, MMP12, MMP11	4.03177	0.744042	0.0444085	8.60076
GOTERM_BP_FAT	GO:0032963~collagen metabolic process	3	0.39267	0.00746323	MMP3, MMP13, MMP11	22.6473	0.999977	0.0533084	11.6362
UP_SEQ_FEATURE	metal ion-binding site:Calcium 2; via carbonyl oxygen	3	0.39267	0.00848977	MMP3, MMP13, MMP12	21.3077	0.938456	0.114159	10.9017
GOTERM_MF_FAT	GO:0004222~metalloendopeptidase activity	4	0.52356	0.0128421	MMP3, MMP13, MMP12, MMP11	8.05397	0.971031	0.188057	15.6614
GOTERM_MF_FAT	GO:0070011~peptidase activity, acting on L-amino acid peptides	8	1.04712	0.0140734	ACE, CASP3, ERAP1, HP, MMP3, MMP13, MMP12, MMP11	3.05141	0.979421	0.184859	17.0373
GOTERM_MF_FAT	GO:0008233~peptidase activity	8	1.04712	0.0175804	ACE, CASP3, ERAP1, HP, MMP3, MMP13, MMP12, MMP11	2.91851	0.992249	0.206596	20.8431
SP_PIR_KEYWORDS	calcium	8	1.04712	0.0229903	MBL2, CD209, CRP, MMP3, ITPR3, MMP13, MMP12, MMP11	2.77727	0.987382	0.120681	25.0664
GOTERM_MF_FAT	GO:0004175~endopeptidase activity	6	0.78534	0.0311182	CASP3, HP, MMP3, MMP13, MMP12, MMP11	3.35045	0.999827	0.292823	34.0713
GOTERM_BP_FAT	GO:0006508~proteolysis	10	1.3089	0.0541932	MBL2, ACE, CASP3, CRP, ERAP1, HP, MMP3, MMP13, MMP12, MMP11	2.00546	1	0.249362	60.1518
GOTERM_MF_FAT	GO:0005509~calcium ion binding	8	1.04712	0.138309	MBL2, CD209, CRP, MMP3, ITPR3, MMP13, MMP12, MMP11	1.82288	1	0.754989	85.9377
SP_PIR_KEYWORDS	metal-binding	14	1.83246	0.244723	CRP, TGFBR2, TIMP4, MMP3, TIMP2, MMP13, MMP12, MMP11, ACE, CD209, ERAP1, ZFHX3, ABO, TPH2	1.31317	1	0.690432	96.9262
SP_PIR_KEYWORDS	hydrolase	8	1.04712	0.309866	ACE, CASP3, PLA2G7, ERAP1, MMP3, MMP13, MMP12, MMP11	1.43418	1	0.766033	98.9962
SP_PIR_KEYWORDS	zinc	9	1.17801	0.516595	ACE, ERAP1, TIMP4, MMP3, TIMP2, ZFHX3, MMP13, MMP12, MMP11	1.14615	1	0.927779	99.9879
GOTERM_MF_FAT	GO:0046914~transition metal ion binding	11	1.43979	0.87098	SLC11A1, ACE, TGFBR2, ERAP1, MMP3, ZFHX3, MMP13, ABO, MMP12, TPH2, MMP11	0.827086	1	0.999995	100
GOTERM_BP_FAT	GO:0009057~macromolecule catabolic process	3	0.39267	0.885857	ACE, CASP3, ERAP1	0.81194	1	0.999767	100
GOTERM_MF_FAT	GO:0046872~metal ion binding	15	1.96335	0.952942	MBL2, CRP, TGFBR2, ITPR3, MMP3, MMP13, MMP12, MMP11, SLC11A1, ACE, CD209, ERAP1, ZFHX3, ABO, TPH2	0.758707	1	1	100
GOTERM_MF_FAT	GO:0043169~cation binding	15	1.96335	0.957561	MBL2, CRP, TGFBR2, ITPR3, MMP3, MMP13, MMP12, MMP11, SLC11A1, ACE, CD209, ERAP1, ZFHX3, ABO, TPH2	0.751627	1	1	100
GOTERM_MF_FAT	GO:0043167~ion binding	15	1.96335	0.964119	MBL2, CRP, TGFBR2, ITPR3, MMP3, MMP13, MMP12, MMP11, SLC11A1, ACE, CD209, ERAP1, ZFHX3, ABO, TPH2	0.740639	1	1	100
GOTERM_MF_FAT	GO:0008270~zinc ion binding	7	0.91623	0.971755	ACE, ERAP1, MMP3, ZFHX3, MMP13, MMP12, MMP11	0.634281	1	1	100
Annotation Cluster 23	Enrichment Score: 2.6879386259461415
Category	Term	Count	%	PValue	Genes	Fold Enrichment	Bonferroni	Benjamini	FDR
GOTERM_BP_FAT	GO:0001816~cytokine production	4	0.52356	0.00126681	IL4, SLC11A1, NOD1, IL18	18.3804	0.835954	0.0132033	2.07153
GOTERM_BP_FAT	GO:0042089~cytokine biosynthetic process	3	0.39267	0.00245589	IL4, NOD1, IL18	39.6328	0.969996	0.0229537	3.97923
GOTERM_BP_FAT	GO:0042107~cytokine metabolic process	3	0.39267	0.00277501	IL4, NOD1, IL18	37.3015	0.980988	0.0254034	4.48524
Annotation Cluster 24	Enrichment Score: 2.6572902073550795
Category	Term	Count	%	PValue	Genes	Fold Enrichment	Bonferroni	Benjamini	FDR
GOTERM_BP_FAT	GO:0050778~positive regulation of immune response	7	0.91623	5.61883e-05	MBL2, SLC11A1, MICB, MICA, CRP, IL1B, TGFB2	10.2043	0.0770006	0.00111225	0.0927471
GOTERM_BP_FAT	GO:0009266~response to temperature stimulus	4	0.52356	0.00678685	MICB, MICA, IL18, IL1B	10.1867	0.999939	0.0493206	10.6365
GOTERM_BP_FAT	GO:0009408~response to heat	3	0.39267	0.0279779	MICB, MICA, IL1B	11.3237	1	0.14727	37.4125
Annotation Cluster 25	Enrichment Score: 2.5910404387626755
Category	Term	Count	%	PValue	Genes	Fold Enrichment	Bonferroni	Benjamini	FDR
GOTERM_BP_FAT	GO:0046649~lymphocyte activation	8	1.04712	3.69605e-05	IL4, SLC11A1, MICB, MICA, CD40LG, SMAD3, CD40, IL10	8.49749	0.0513418	0.000798268	0.061018
GOTERM_BP_FAT	GO:0002768~immune response-regulating cell surface receptor signaling pathway	3	0.39267	0.0163052	MICB, MICA, CD40	15.0982	1	0.0973048	23.7748
GOTERM_BP_FAT	GO:0002764~immune response-regulating signal transduction	3	0.39267	0.0279779	MICB, MICA, CD40	11.3237	1	0.14727	37.4125
Annotation Cluster 26	Enrichment Score: 2.49615172166142
Category	Term	Count	%	PValue	Genes	Fold Enrichment	Bonferroni	Benjamini	FDR
INTERPRO	IPR013783:Immunoglobulin-like fold	13	1.70157	1.80176e-06	MICB, MICA, CTLA4, BTNL2, HLA-C, HLA-B, HLA-E, HLA-G, PDCD1, KDR, FCGR2B, FCGR2A, HLA-DOB, FCGR3B	5.75915	0.000309855	0.000309855	0.00220243
SP_PIR_KEYWORDS	Immunoglobulin domain	9	1.17801	0.000244894	MICB, MICA, FCGR2B, BTNL2, CTLA4, FCGR2A, FCGR3B, PDCD1, KDR	5.33811	0.0450016	0.003065	0.303413
SP_PIR_KEYWORDS	igg-binding protein	3	0.39267	0.000255664	FCGR2B, FCGR2A, FCGR3B	119.472	0.0469339	0.00299993	0.316738
PIR_SUPERFAMILY	PIRSF001980:Fc gamma receptor III	3	0.39267	0.000478359	FCGR2B, FCGR2A, FCGR3B	83.7283	0.0245737	0.00825925	0.463789
GOTERM_MF_FAT	GO:0019864~IgG binding	3	0.39267	0.000597064	FCGR2B, FCGR2A, FCGR3B	78.5262	0.150956	0.0147667	0.783967
GOTERM_MF_FAT	GO:0019865~immunoglobulin binding	3	0.39267	0.00219207	FCGR2B, FCGR2A, FCGR3B	41.8806	0.451893	0.0451994	2.8505
GOTERM_MF_FAT	GO:0032403~protein complex binding	5	0.65445	0.0134594	TNFRSF1A, FCGR2B, FCGR2A, TIMP2, FCGR3B	5.34192	0.975594	0.186389	16.3538
INTERPRO	IPR013106:Immunoglobulin V-set	5	0.65445	0.0179163	FCGR2B, BTNL2, CTLA4, PDCD1, KDR	4.91938	0.955379	0.16716	19.8278
UP_SEQ_FEATURE	domain:Ig-like C2-type 1	4	0.52356	0.0302435	FCGR2B, FCGR2A, FCGR3B, KDR	5.83158	0.999956	0.341919	34.0169
UP_SEQ_FEATURE	domain:Ig-like C2-type 2	4	0.52356	0.0306498	FCGR2B, FCGR2A, FCGR3B, KDR	5.80105	0.999962	0.33447	34.3901
INTERPRO	IPR003599:Immunoglobulin subtype	5	0.65445	0.0437842	FCGR2B, BTNL2, FCGR2A, FCGR3B, KDR	3.7119	0.999547	0.34807	42.1482
INTERPRO	IPR013151:Immunoglobulin	4	0.52356	0.04781	FCGR2B, FCGR2A, FCGR3B, KDR	4.85119	0.999781	0.35821	45.0561
SMART	SM00409:IG	5	0.65445	0.107371	FCGR2B, BTNL2, FCGR2A, FCGR3B, KDR	2.69727	0.990505	0.539829	64.8406
Annotation Cluster 27	Enrichment Score: 2.4344212601819604
Category	Term	Count	%	PValue	Genes	Fold Enrichment	Bonferroni	Benjamini	FDR
GOTERM_BP_FAT	GO:0043065~positive regulation of apoptosis	10	1.3089	0.000157257	CASP3, NOD1, TNF, SMAD3, IL1B, NLRP1, IL10, NFKBIL1, LTA, TGFB2	4.9157	0.200897	0.0024347	0.259372
GOTERM_BP_FAT	GO:0043068~positive regulation of programmed cell death	10	1.3089	0.00016569	CASP3, NOD1, TNF, SMAD3, IL1B, NLRP1, IL10, NFKBIL1, LTA, TGFB2	4.88164	0.210452	0.00253757	0.273264
GOTERM_BP_FAT	GO:0010942~positive regulation of cell death	10	1.3089	0.000171521	CASP3, NOD1, TNF, SMAD3, IL1B, NLRP1, IL10, NFKBIL1, LTA, TGFB2	4.8592	0.21699	0.00257153	0.282867
GOTERM_BP_FAT	GO:0043085~positive regulation of catalytic activity	10	1.3089	0.000635984	AGTR1, SLC11A1, DAB1, NOD1, TNF, TGFBR2, SMAD3, IL1B, NLRP1, TGFB2	4.0649	0.596348	0.00717416	1.04508
GOTERM_BP_FAT	GO:0006919~activation of caspase activity	4	0.52356	0.00201591	NOD1, TNF, SMAD3, NLRP1	15.6574	0.94373	0.0193851	3.27746
GOTERM_BP_FAT	GO:0043280~positive regulation of caspase activity	4	0.52356	0.00259885	NOD1, TNF, SMAD3, NLRP1	14.3305	0.975542	0.0241175	4.20623
GOTERM_BP_FAT	GO:0010952~positive regulation of peptidase activity	4	0.52356	0.00259885	NOD1, TNF, SMAD3, NLRP1	14.3305	0.975542	0.0241175	4.20623
GOTERM_BP_FAT	GO:0006917~induction of apoptosis	7	0.91623	0.00366008	CASP3, NOD1, TNF, SMAD3, NLRP1, NFKBIL1, LTA	4.62383	0.99464	0.0310081	5.87554
GOTERM_BP_FAT	GO:0012502~induction of programmed cell death	7	0.91623	0.00371641	CASP3, NOD1, TNF, SMAD3, NLRP1, NFKBIL1, LTA	4.60942	0.995055	0.0312932	5.96339
GOTERM_BP_FAT	GO:0043281~regulation of caspase activity	4	0.52356	0.00591856	NOD1, TNF, SMAD3, NLRP1	10.7025	0.999789	0.0440277	9.33761
GOTERM_BP_FAT	GO:0052548~regulation of endopeptidase activity	4	0.52356	0.00656309	NOD1, TNF, SMAD3, NLRP1	10.311	0.999916	0.0479724	10.3035
GOTERM_BP_FAT	GO:0052547~regulation of peptidase activity	4	0.52356	0.00748526	NOD1, TNF, SMAD3, NLRP1	9.8314	0.999978	0.0531967	11.6686
GOTERM_BP_FAT	GO:0051345~positive regulation of hydrolase activity	5	0.65445	0.00962634	AGTR1, NOD1, TNF, SMAD3, NLRP1	5.90433	0.999999	0.0638676	14.7631
GOTERM_BP_FAT	GO:0051336~regulation of hydrolase activity	6	0.78534	0.020153	AGTR1, NOD1, TNF, SMAD3, NLRP1, TGFB2	3.76335	1	0.116213	28.5519
GOTERM_MF_FAT	GO:0042802~identical protein binding	6	0.78534	0.181182	SLC11A1, NOD1, TNF, VEGFA, SMAD3, TGFB2	1.96316	1	0.838893	92.8225
GOTERM_MF_FAT	GO:0008047~enzyme activator activity	4	0.52356	0.208207	AGTR1, NOD1, TIMP2, NLRP1	2.50034	1	0.864524	95.388
Annotation Cluster 28	Enrichment Score: 2.3985499535158596
Category	Term	Count	%	PValue	Genes	Fold Enrichment	Bonferroni	Benjamini	FDR
GOTERM_BP_FAT	GO:0050778~positive regulation of immune response	7	0.91623	5.61883e-05	MBL2, SLC11A1, MICB, MICA, CRP, IL1B, TGFB2	10.2043	0.0770006	0.00111225	0.0927471
GOTERM_BP_FAT	GO:0006953~acute-phase response	3	0.39267	0.0148593	MBL2, CRP, IL1B	15.8531	1	0.0909047	21.9034
GOTERM_BP_FAT	GO:0002526~acute inflammatory response	3	0.39267	0.0763318	MBL2, CRP, IL1B	6.47066	1	0.323241	73.051
Annotation Cluster 29	Enrichment Score: 2.347314873296853
Category	Term	Count	%	PValue	Genes	Fold Enrichment	Bonferroni	Benjamini	FDR
GOTERM_BP_FAT	GO:0007584~response to nutrient	6	0.78534	0.000479741	MICB, MSH5, TGFBR2, IL1B, ANGPT1, LTA	9.05893	0.495544	0.00578216	0.789288
GOTERM_BP_FAT	GO:0031667~response to nutrient levels	6	0.78534	0.00220748	MICB, MSH5, TGFBR2, IL1B, ANGPT1, LTA	6.43782	0.957205	0.0209278	3.5836
GOTERM_BP_FAT	GO:0009991~response to extracellular stimulus	6	0.78534	0.00355316	MICB, MSH5, TGFBR2, IL1B, ANGPT1, LTA	5.76477	0.993754	0.0304761	5.7086
GOTERM_BP_FAT	GO:0043627~response to estrogen stimulus	4	0.52356	0.0128828	TGFBR2, IL1B, ANGPT1, MMP13	8.05238	1	0.0802618	19.2752
GOTERM_BP_FAT	GO:0033273~response to vitamin	3	0.39267	0.0378354	MICB, IL1B, ANGPT1	9.60795	1	0.185536	47.1085
Annotation Cluster 30	Enrichment Score: 2.1657948610870306
Category	Term	Count	%	PValue	Genes	Fold Enrichment	Bonferroni	Benjamini	FDR
GOTERM_BP_FAT	GO:0001525~angiogenesis	8	1.04712	5.3933e-06	IL18, VEGFA, TGFBR2, ERAP1, IL1B, ANGPT1, KDR, TGFB2	11.4257	0.00766137	0.000202371	0.00890595
GOTERM_BP_FAT	GO:0048514~blood vessel morphogenesis	9	1.17801	5.68876e-06	ACE, IL18, VEGFA, TGFBR2, ERAP1, IL1B, ANGPT1, KDR, TGFB2	9.016	0.00807938	0.000202784	0.00939382
GOTERM_BP_FAT	GO:0032103~positive regulation of response to external stimulus	6	0.78534	1.15025e-05	AGTR1, TNFRSF1A, VEGFA, SMAD3, CCL5, KDR	19.8164	0.0162689	0.000315387	0.0189932
GOTERM_BP_FAT	GO:0001568~blood vessel development	9	1.17801	1.69267e-05	ACE, IL18, VEGFA, TGFBR2, ERAP1, IL1B, ANGPT1, KDR, TGFB2	7.7648	0.0238487	0.000430937	0.0279485
GOTERM_BP_FAT	GO:0001944~vasculature development	9	1.17801	2.01542e-05	ACE, IL18, VEGFA, TGFBR2, ERAP1, IL1B, ANGPT1, KDR, TGFB2	7.57918	0.0283312	0.000495399	0.0332769
GOTERM_BP_FAT	GO:0001666~response to hypoxia	7	0.91623	3.61023e-05	ACE, IL18, VEGFA, SMAD3, ANGPT1, MMP13, TGFB2	11.042	0.05018	0.000791729	0.0596014
GOTERM_BP_FAT	GO:0070482~response to oxygen levels	7	0.91623	4.80528e-05	ACE, IL18, VEGFA, SMAD3, ANGPT1, MMP13, TGFB2	10.4938	0.0662298	0.000978449	0.0793233
GOTERM_BP_FAT	GO:0042698~ovulation cycle	5	0.65445	0.000262769	VEGFA, TIMP4, ANGPT1, KDR, TGFB2	15.7743	0.312544	0.00356276	0.433045
GOTERM_BP_FAT	GO:0050678~regulation of epithelial cell proliferation	5	0.65445	0.000328502	VEGFA, SMAD3, MMP12, KDR, TGFB2	14.8856	0.374073	0.00425022	0.541097
GOTERM_BP_FAT	GO:0048511~rhythmic process	5	0.65445	0.00296023	VEGFA, TIMP4, ANGPT1, KDR, TGFB2	8.25684	0.985412	0.0267358	4.77777
GOTERM_BP_FAT	GO:0022602~ovulation cycle process	4	0.52356	0.00299364	VEGFA, ANGPT1, KDR, TGFB2	13.6371	0.986093	0.0266963	4.83045
GOTERM_BP_FAT	GO:0050927~positive regulation of positive chemotaxis	3	0.39267	0.00346833	VEGFA, SMAD3, KDR	33.375	0.992948	0.03012	5.57595
GOTERM_BP_FAT	GO:0050926~regulation of positive chemotaxis	3	0.39267	0.00346833	VEGFA, SMAD3, KDR	33.375	0.992948	0.03012	5.57595
GOTERM_BP_FAT	GO:0030334~regulation of cell migration	5	0.65445	0.00790051	ACE, VEGFA, SMAD3, KDR, TGFB2	6.2537	0.999988	0.0552534	12.2769
GOTERM_BP_FAT	GO:0050921~positive regulation of chemotaxis	3	0.39267	0.00799216	VEGFA, SMAD3, KDR	21.8664	0.999989	0.0556072	12.4106
GOTERM_BP_FAT	GO:0030335~positive regulation of cell migration	4	0.52356	0.00822476	VEGFA, SMAD3, KDR, TGFB2	9.5	0.999992	0.0569086	12.7491
GOTERM_BP_FAT	GO:0050920~regulation of chemotaxis	3	0.39267	0.00909912	VEGFA, SMAD3, KDR	20.4556	0.999998	0.0613151	14.0107
GOTERM_BP_FAT	GO:0040017~positive regulation of locomotion	4	0.52356	0.0106949	VEGFA, SMAD3, KDR, TGFB2	8.62755	1	0.0691434	16.2692
GOTERM_BP_FAT	GO:0051272~positive regulation of cell motion	4	0.52356	0.0106949	VEGFA, SMAD3, KDR, TGFB2	8.62755	1	0.0691434	16.2692
GOTERM_BP_FAT	GO:0048520~positive regulation of behavior	3	0.39267	0.0108799	VEGFA, SMAD3, KDR	18.6507	1	0.0699872	16.5274
GOTERM_BP_FAT	GO:0040012~regulation of locomotion	5	0.65445	0.0122142	ACE, VEGFA, SMAD3, KDR, TGFB2	5.50456	1	0.077584	18.3675
GOTERM_BP_FAT	GO:0051270~regulation of cell motion	5	0.65445	0.01243	ACE, VEGFA, SMAD3, KDR, TGFB2	5.47604	1	0.0782157	18.6615
GOTERM_BP_FAT	GO:0001541~ovarian follicle development	3	0.39267	0.015575	VEGFA, ANGPT1, KDR	15.4665	1	0.0939047	22.835
GOTERM_BP_FAT	GO:0050795~regulation of behavior	3	0.39267	0.0193688	VEGFA, SMAD3, KDR	13.7853	1	0.112363	27.6018
GOTERM_BP_FAT	GO:0007167~enzyme linked receptor protein signaling pathway	6	0.78534	0.0213248	VEGFA, TGFBR2, SMAD3, ANGPT1, KDR, TGFB2	3.70833	1	0.120684	29.9499
SP_PIR_KEYWORDS	angiogenesis	3	0.39267	0.0228399	VEGFA, ANGPT1, KDR	12.6713	0.987012	0.123332	24.9232
GOTERM_BP_FAT	GO:0022604~regulation of cell morphogenesis	4	0.52356	0.0231145	VEGFA, SMAD3, KDR, TGFB2	6.4542	1	0.128729	32.0356
KEGG_PATHWAY	hsa05212:Pancreatic cancer	4	0.52356	0.026758	VEGFA, TGFBR2, SMAD3, TGFB2	6.01064	0.869213	0.112776	24.7724
GOTERM_BP_FAT	GO:0008585~female gonad development	3	0.39267	0.0357703	VEGFA, ANGPT1, KDR	9.9082	1	0.177391	45.2023
GOTERM_BP_FAT	GO:0046660~female sex differentiation	3	0.39267	0.0410167	VEGFA, ANGPT1, KDR	9.19022	1	0.198441	49.9235
GOTERM_BP_FAT	GO:0046545~development of primary female sexual characteristics	3	0.39267	0.0410167	VEGFA, ANGPT1, KDR	9.19022	1	0.198441	49.9235
GOTERM_BP_FAT	GO:0048609~reproductive process in a multicellular organism	6	0.78534	0.0759456	MSH5, VEGFA, TIMP4, ANGPT1, KDR, TGFB2	2.60421	1	0.32276	72.8644
GOTERM_BP_FAT	GO:0032504~multicellular organism reproduction	6	0.78534	0.0759456	MSH5, VEGFA, TIMP4, ANGPT1, KDR, TGFB2	2.60421	1	0.32276	72.8644
GOTERM_BP_FAT	GO:0021700~developmental maturation	3	0.39267	0.080396	VEGFA, KDR, TGFB2	6.27847	1	0.334958	74.9437
GOTERM_BP_FAT	GO:0008406~gonad development	3	0.39267	0.0958463	VEGFA, ANGPT1, KDR	5.66183	1	0.379566	81.0592
GOTERM_BP_FAT	GO:0048608~reproductive structure development	3	0.39267	0.116609	VEGFA, ANGPT1, KDR	5.03274	1	0.438868	87.0942
GOTERM_BP_FAT	GO:0045137~development of primary sexual characteristics	3	0.39267	0.118134	VEGFA, ANGPT1, KDR	4.99311	1	0.442303	87.4571
GOTERM_BP_FAT	GO:0003006~reproductive developmental process	4	0.52356	0.122805	VEGFA, ANGPT1, KDR, TGFB2	3.2271	1	0.453747	88.5104
GOTERM_BP_FAT	GO:0007548~sex differentiation	3	0.39267	0.156082	VEGFA, ANGPT1, KDR	4.1995	1	0.531677	93.9334
GOTERM_MF_FAT	GO:0042803~protein homodimerization activity	4	0.52356	0.20699	SLC11A1, VEGFA, SMAD3, TGFB2	2.50782	1	0.871248	95.2937
SP_PIR_KEYWORDS	differentiation	4	0.52356	0.22205	DAB1, VEGFA, ANGPT1, KDR	2.42407	1	0.657969	95.5634
GOTERM_BP_FAT	GO:0007169~transmembrane receptor protein tyrosine kinase signaling pathway	3	0.39267	0.280265	VEGFA, ANGPT1, KDR	2.83092	1	0.754413	99.5621
SP_PIR_KEYWORDS	developmental protein	4	0.52356	0.523572	DAB1, VEGFA, ANGPT1, KDR	1.43142	1	0.927922	99.9899
Annotation Cluster 31	Enrichment Score: 2.120914672185277
Category	Term	Count	%	PValue	Genes	Fold Enrichment	Bonferroni	Benjamini	FDR
GOTERM_BP_FAT	GO:0006909~phagocytosis	4	0.52356	0.00143387	MBL2, SLC11A1, CRP, CD14	17.6146	0.870771	0.0146128	2.3417
GOTERM_BP_FAT	GO:0002252~immune effector process	5	0.65445	0.00349005	MBL2, SLC11A1, MICA, CD40LG, CRP	7.88713	0.993164	0.0301229	5.60993
GOTERM_BP_FAT	GO:0010324~membrane invagination	6	0.78534	0.00355316	MBL2, SLC11A1, CD209, CRP, TGFBR2, CD14	5.76477	0.993754	0.0304761	5.7086
GOTERM_BP_FAT	GO:0006897~endocytosis	6	0.78534	0.00355316	MBL2, SLC11A1, CD209, CRP, TGFBR2, CD14	5.76477	0.993754	0.0304761	5.7086
GOTERM_BP_FAT	GO:0002449~lymphocyte mediated immunity	4	0.52356	0.00422015	MBL2, SLC11A1, CD40LG, CRP	12.0786	0.997596	0.0342587	6.74547
GOTERM_BP_FAT	GO:0002443~leukocyte mediated immunity	4	0.52356	0.00748526	MBL2, SLC11A1, CD40LG, CRP	9.8314	0.999978	0.0531967	11.6686
GOTERM_MF_FAT	GO:0030246~carbohydrate binding	6	0.78534	0.0250817	MBL2, NOD1, CD209, VEGFA, TGFBR2, CD14	3.54921	0.999051	0.261113	28.448
GOTERM_BP_FAT	GO:0016044~membrane organization	6	0.78534	0.0320124	MBL2, SLC11A1, CD209, CRP, TGFBR2, CD14	3.32874	1	0.164008	41.567
GOTERM_BP_FAT	GO:0016192~vesicle-mediated transport	7	0.91623	0.0509317	MBL2, SLC11A1, CD209, CRP, TGFBR2, CCL5, CD14	2.56879	1	0.237435	57.8209
Annotation Cluster 32	Enrichment Score: 2.028707501456243
Category	Term	Count	%	PValue	Genes	Fold Enrichment	Bonferroni	Benjamini	FDR
GOTERM_BP_FAT	GO:0001525~angiogenesis	8	1.04712	5.3933e-06	IL18, VEGFA, TGFBR2, ERAP1, IL1B, ANGPT1, KDR, TGFB2	11.4257	0.00766137	0.000202371	0.00890595
GOTERM_BP_FAT	GO:0032101~regulation of response to external stimulus	8	1.04712	8.6464e-06	AGTR1, TNFRSF1A, VEGFA, TGFBR2, SMAD3, CCL5, IL10, KDR	10.6352	0.0122541	0.000268004	0.0142774
GOTERM_BP_FAT	GO:0002053~positive regulation of mesenchymal cell proliferation	3	0.39267	0.00277501	VEGFA, TGFBR2, KDR	37.3015	0.980988	0.0254034	4.48524
GOTERM_BP_FAT	GO:0010464~regulation of mesenchymal cell proliferation	3	0.39267	0.00311255	VEGFA, TGFBR2, KDR	35.2292	0.988268	0.0275714	5.01772
GOTERM_BP_FAT	GO:0001570~vasculogenesis	3	0.39267	0.015575	VEGFA, TGFBR2, KDR	15.4665	1	0.0939047	22.835
GOTERM_BP_FAT	GO:0007167~enzyme linked receptor protein signaling pathway	6	0.78534	0.0213248	VEGFA, TGFBR2, SMAD3, ANGPT1, KDR, TGFB2	3.70833	1	0.120684	29.9499
GOTERM_BP_FAT	GO:0048754~branching morphogenesis of a tube	3	0.39267	0.0367972	VEGFA, TGFBR2, KDR	9.75577	1	0.181461	46.1581
GOTERM_BP_FAT	GO:0001763~morphogenesis of a branching structure	3	0.39267	0.0465338	VEGFA, TGFBR2, KDR	8.56926	1	0.220345	54.4746
GOTERM_BP_FAT	GO:0030324~lung development	3	0.39267	0.077679	VEGFA, TGFBR2, KDR	6.4053	1	0.327163	73.6928
GOTERM_BP_FAT	GO:0030323~respiratory tube development	3	0.39267	0.0817656	VEGFA, TGFBR2, KDR	6.21691	1	0.338831	75.5529
GOTERM_BP_FAT	GO:0060541~respiratory system development	3	0.39267	0.0901327	VEGFA, TGFBR2, KDR	5.87153	1	0.364611	78.9827
GOTERM_BP_FAT	GO:0035239~tube morphogenesis	3	0.39267	0.118134	VEGFA, TGFBR2, KDR	4.99311	1	0.442303	87.4571
GOTERM_BP_FAT	GO:0035295~tube development	3	0.39267	0.273341	VEGFA, TGFBR2, KDR	2.88239	1	0.745213	99.4871
Annotation Cluster 33	Enrichment Score: 1.9918778580848555
Category	Term	Count	%	PValue	Genes	Fold Enrichment	Bonferroni	Benjamini	FDR
GOTERM_BP_FAT	GO:0048584~positive regulation of response to stimulus	15	1.96335	2.88142e-12	MBL2, MICB, TNF, MICA, CRP, SMAD3, CCL5, TGFB2, KDR, AGTR1, SLC11A1, TNFRSF1A, NOD1, VEGFA, IL1B	13.4349	4.10898e-09	8.21796e-10	4.75837e-09
SP_PIR_KEYWORDS	lymphokine	5	0.65445	1.39209e-07	IL4, TNF, IL1B, IL10, LTA	99.56	2.6171e-05	3.27141e-06	0.000172715
KEGG_PATHWAY	hsa05310:Asthma	6	0.78534	4.89638e-06	IL4, TNF, CD40LG, CD40, HLA-DOB, IL10	22.3844	0.000367162	7.34432e-05	0.00513865
GOTERM_BP_FAT	GO:0002637~regulation of immunoglobulin production	5	0.65445	5.91205e-06	IL4, TNF, CD40LG, CD40, IL10	40.649	0.00839518	0.000205604	0.00976253
GOTERM_BP_FAT	GO:0002697~regulation of immune effector process	7	0.91623	7.18152e-06	IL4, MICB, TNF, CD40LG, IL1B, CD40, IL10	14.6498	0.0101886	0.00023272	0.0118587
GOTERM_BP_FAT	GO:0002700~regulation of production of molecular mediator of immune response	5	0.65445	3.80067e-05	IL4, TNF, CD40LG, CD40, IL10	25.7774	0.052756	0.000796719	0.0627445
GOTERM_BP_FAT	GO:0033157~regulation of intracellular protein transport	5	0.65445	0.000105398	TNF, SMAD3, IL1B, IL10, NFKBIL1	19.941	0.139555	0.00192515	0.173909
GOTERM_BP_FAT	GO:0002822~regulation of adaptive immune response based on somatic recombination of immune receptors built from immunoglobulin superfamily domains	5	0.65445	0.000121907	IL4, SLC11A1, IL1B, CD40, IL10	19.2159	0.159576	0.00209238	0.201122
GOTERM_BP_FAT	GO:0002819~regulation of adaptive immune response	5	0.65445	0.000130828	IL4, SLC11A1, IL1B, CD40, IL10	18.8728	0.170202	0.00219257	0.215826
GOTERM_BP_FAT	GO:0046822~regulation of nucleocytoplasmic transport	5	0.65445	0.000150076	TNF, SMAD3, IL1B, IL10, NFKBIL1	18.222	0.192671	0.00240188	0.247542
GOTERM_BP_FAT	GO:0042742~defense response to bacterium	6	0.78534	0.000170534	TNFRSF1A, SLC11A1, MICA, NOD1, TNF, IL10	11.3237	0.215887	0.00258392	0.281243
GOTERM_BP_FAT	GO:0043066~negative regulation of apoptosis	9	1.17801	0.000224157	IL4, CASP3, TNF, CD40LG, VEGFA, SMAD3, IL1B, IL10, MIF	5.37394	0.273622	0.00316019	0.369523
GOTERM_BP_FAT	GO:0043069~negative regulation of programmed cell death	9	1.17801	0.000246525	IL4, CASP3, TNF, CD40LG, VEGFA, SMAD3, IL1B, IL10, MIF	5.29909	0.29643	0.00340766	0.406327
GOTERM_BP_FAT	GO:0060548~negative regulation of cell death	9	1.17801	0.000251212	IL4, CASP3, TNF, CD40LG, VEGFA, SMAD3, IL1B, IL10, MIF	5.28437	0.301118	0.00343901	0.414036
GOTERM_BP_FAT	GO:0032386~regulation of intracellular transport	5	0.65445	0.000328502	TNF, SMAD3, IL1B, IL10, NFKBIL1	14.8856	0.374073	0.00425022	0.541097
GOTERM_BP_FAT	GO:0051046~regulation of secretion	7	0.91623	0.000344473	AGTR1, TNF, CD40LG, IL1B, CD40, IL10, TGFB2	7.32488	0.388171	0.00441637	0.567333
GOTERM_BP_FAT	GO:0042990~regulation of transcription factor import into nucleus	4	0.52356	0.000357263	TNF, SMAD3, IL10, NFKBIL1	28.1833	0.399233	0.00453921	0.588341
BIOCARTA	h_cytokinePathway:Cytokine Network	5	0.65445	0.000390797	IL4, TNF, IL18, IL10, LTA	12.8304	0.0266098	0.0266098	0.402517
GOTERM_BP_FAT	GO:0042306~regulation of protein import into nucleus	4	0.52356	0.00111258	TNF, SMAD3, IL10, NFKBIL1	19.2159	0.795549	0.0117766	1.82151
KEGG_PATHWAY	hsa04660:T cell receptor signaling pathway	6	0.78534	0.00270031	IL4, TNF, CD40LG, CTLA4, PDCD1, IL10	6.01064	0.183556	0.0154787	2.79793
GOTERM_BP_FAT	GO:0051091~positive regulation of transcription factor activity	4	0.52356	0.00272662	IL4, TNF, IL1B, IL10	14.0917	0.979625	0.0251265	4.40867
GOTERM_BP_FAT	GO:0002521~leukocyte differentiation	5	0.65445	0.00321769	IL4, TNF, CD40LG, TGFBR2, IL10	8.06775	0.989906	0.0283153	5.18301
GOTERM_BP_FAT	GO:0043388~positive regulation of DNA binding	4	0.52356	0.00422015	IL4, TNF, IL1B, IL10	12.0786	0.997596	0.0342587	6.74547
GOTERM_BP_FAT	GO:0051098~regulation of binding	5	0.65445	0.00558683	IL4, TNF, SMAD3, IL1B, IL10	6.90768	0.999661	0.0424902	8.83669
GOTERM_BP_FAT	GO:0051099~positive regulation of binding	4	0.52356	0.00571257	IL4, TNF, IL1B, IL10	10.8397	0.999717	0.0431985	9.02687
GOTERM_BP_FAT	GO:0010604~positive regulation of macromolecule metabolic process	11	1.43979	0.00590814	IL4, AGTR1, TNFRSF1A, SLC11A1, TNF, VEGFA, SMAD3, IL1B, CD40, IL10, TGFB2	2.7131	0.999786	0.0441814	9.32192
GOTERM_MF_FAT	GO:0008083~growth factor activity	5	0.65445	0.00687029	IL4, VEGFA, IL1B, IL10, TGFB2	6.50321	0.84877	0.111357	8.68455
GOTERM_BP_FAT	GO:0051241~negative regulation of multicellular organismal process	5	0.65445	0.00712	SLC11A1, TNF, VEGFA, TGFBR2, IL10	6.44436	0.999962	0.0511674	11.1302
GOTERM_BP_FAT	GO:0043193~positive regulation of gene-specific transcription	4	0.52356	0.00772717	IL4, TNF, SMAD3, IL10	9.71839	0.999984	0.0543354	12.0234
BBID	88.Alternatively_Activated_APC	4	0.52356	0.00805897	IL4, TNF, IL10, CD14	8.13636	0.332744	0.332744	7.49743
GOTERM_BP_FAT	GO:0051173~positive regulation of nitrogen compound metabolic process	9	1.17801	0.00969585	IL4, TNFRSF1A, SLC11A1, TNF, VEGFA, SMAD3, IL1B, CD40, IL10	2.954	0.999999	0.063726	14.8619
GOTERM_BP_FAT	GO:0010557~positive regulation of macromolecule biosynthetic process	9	1.17801	0.0105829	IL4, TNFRSF1A, SLC11A1, TNF, VEGFA, SMAD3, IL1B, IL10, TGFB2	2.90883	1	0.0687508	16.1125
BIOCARTA	h_inflamPathway:Cytokines and Inflammatory Response	4	0.52356	0.0115361	IL4, TNF, IL10, LTA	7.8956	0.550949	0.124917	11.284
GOTERM_BP_FAT	GO:0051090~regulation of transcription factor activity	4	0.52356	0.0122336	IL4, TNF, IL1B, IL10	8.20874	1	0.0773605	18.394
GOTERM_BP_FAT	GO:0001818~negative regulation of cytokine production	3	0.39267	0.0134724	SLC11A1, TNF, IL10	16.6875	1	0.0834392	20.0677
GOTERM_BP_FAT	GO:0009891~positive regulation of biosynthetic process	9	1.17801	0.0148654	IL4, TNFRSF1A, SLC11A1, TNF, VEGFA, SMAD3, IL1B, IL10, TGFB2	2.73723	1	0.090555	21.9113
GOTERM_BP_FAT	GO:0006916~anti-apoptosis	5	0.65445	0.0154603	TNF, CD40LG, VEGFA, IL1B, IL10	5.13046	1	0.093634	22.6864
GOTERM_BP_FAT	GO:0051101~regulation of DNA binding	4	0.52356	0.0187825	IL4, TNF, IL1B, IL10	6.9876	1	0.109565	26.8836
BBID	111.Stress_influences_immunity	3	0.39267	0.0223364	IL4, TNF, IL10	11.1875	0.6768	0.431493	19.5529
BBID	112.StressandCRHinfluence	3	0.39267	0.0223364	IL4, TNF, IL10	11.1875	0.6768	0.431493	19.5529
GOTERM_BP_FAT	GO:0045893~positive regulation of transcription, DNA-dependent	7	0.91623	0.0232392	IL4, TNFRSF1A, SLC11A1, TNF, VEGFA, SMAD3, IL10	3.10194	1	0.128888	32.1787
BBID	97.Immune_injury_MS-lesions_MS_antigen	4	0.52356	0.024043	IL4, TNF, IL10, LTA	5.59375	0.703835	0.333432	20.8953
GOTERM_BP_FAT	GO:0051254~positive regulation of RNA metabolic process	7	0.91623	0.0240933	IL4, TNFRSF1A, SLC11A1, TNF, VEGFA, SMAD3, IL10	3.07614	1	0.131835	33.1515
GOTERM_BP_FAT	GO:0032583~regulation of gene-specific transcription	4	0.52356	0.0245114	IL4, TNF, SMAD3, IL10	6.3097	1	0.132983	33.6228
GOTERM_BP_FAT	GO:0045935~positive regulation of nucleobase, nucleoside, nucleotide and nucleic acid metabolic process	8	1.04712	0.0254008	IL4, TNFRSF1A, SLC11A1, TNF, VEGFA, SMAD3, CD40, IL10	2.70994	1	0.136497	34.6152
GOTERM_BP_FAT	GO:0045944~positive regulation of transcription from RNA polymerase II promoter	6	0.78534	0.029004	IL4, TNFRSF1A, SLC11A1, TNF, VEGFA, SMAD3	3.41846	1	0.151216	38.4947
BBID	113.Th1andTh2cells	3	0.39267	0.0305131	IL4, IL10, LTA	9.58929	0.787628	0.266467	25.8041
GOTERM_BP_FAT	GO:0031328~positive regulation of cellular biosynthetic process	8	1.04712	0.0392865	IL4, TNFRSF1A, SLC11A1, TNF, VEGFA, SMAD3, IL1B, IL10	2.46861	1	0.19141	48.4105
KEGG_PATHWAY	hsa04640:Hematopoietic cell lineage	4	0.52356	0.0420864	IL4, TNF, IL1B, CD14	5.03216	0.960237	0.148913	36.3176
GOTERM_BP_FAT	GO:0045941~positive regulation of transcription	7	0.91623	0.0468151	IL4, TNFRSF1A, SLC11A1, TNF, VEGFA, SMAD3, IL10	2.62345	1	0.220834	54.6958
GOTERM_BP_FAT	GO:0010628~positive regulation of gene expression	7	0.91623	0.0527114	IL4, TNFRSF1A, SLC11A1, TNF, VEGFA, SMAD3, IL10	2.54669	1	0.244052	59.1081
BBID	56.Macrophage_regulation_of_CD4+T_cells	3	0.39267	0.0607559	IL4, TNF, IL10	6.7125	0.956457	0.324127	45.3213
GOTERM_BP_FAT	GO:0001934~positive regulation of protein amino acid phosphorylation	3	0.39267	0.0645639	IL4, TNF, IL1B	7.125	1	0.287304	66.7848
GOTERM_BP_FAT	GO:0042327~positive regulation of phosphorylation	3	0.39267	0.0749923	IL4, TNF, IL1B	6.53737	1	0.321127	72.3983
GOTERM_BP_FAT	GO:0010608~posttranscriptional regulation of gene expression	4	0.52356	0.0752471	SLC11A1, TNF, VEGFA, SMAD3	4.00711	1	0.32114	72.5236
GOTERM_BP_FAT	GO:0010562~positive regulation of phosphorus metabolic process	3	0.39267	0.0790338	IL4, TNF, IL1B	6.34125	1	0.331068	74.3237
GOTERM_BP_FAT	GO:0045937~positive regulation of phosphate metabolic process	3	0.39267	0.0790338	IL4, TNF, IL1B	6.34125	1	0.331068	74.3237
GOTERM_BP_FAT	GO:0032270~positive regulation of cellular protein metabolic process	4	0.52356	0.0945733	IL4, AGTR1, TNF, IL1B	3.62876	1	0.376395	80.6139
GOTERM_BP_FAT	GO:0051247~positive regulation of protein metabolic process	4	0.52356	0.103974	IL4, AGTR1, TNF, IL1B	3.47942	1	0.403503	83.6831
GOTERM_BP_FAT	GO:0006357~regulation of transcription from RNA polymerase II promoter	7	0.91623	0.121493	IL4, TNFRSF1A, SLC11A1, TNF, VEGFA, SMAD3, ZFHX3	2.03525	1	0.451031	88.2232
GOTERM_BP_FAT	GO:0032268~regulation of cellular protein metabolic process	5	0.65445	0.178889	IL4, AGTR1, TNF, IL1B, IL10	2.22969	1	0.579987	96.1411
GOTERM_MF_FAT	GO:0042802~identical protein binding	6	0.78534	0.181182	SLC11A1, NOD1, TNF, VEGFA, SMAD3, TGFB2	1.96316	1	0.838893	92.8225
GOTERM_BP_FAT	GO:0001932~regulation of protein amino acid phosphorylation	3	0.39267	0.192611	IL4, TNF, IL1B	3.66546	1	0.607754	97.0786
GOTERM_MF_FAT	GO:0042803~protein homodimerization activity	4	0.52356	0.20699	SLC11A1, VEGFA, SMAD3, TGFB2	2.50782	1	0.871248	95.2937
GOTERM_BP_FAT	GO:0031401~positive regulation of protein modification process	3	0.39267	0.216415	IL4, TNF, IL1B	3.39104	1	0.651404	98.2178
BBID	80.T_cell_Activation	3	0.39267	0.217191	IL4, IL10, LTA	3.19643	0.999995	0.671438	90.543
GOTERM_BP_FAT	GO:0000122~negative regulation of transcription from RNA polymerase II promoter	3	0.39267	0.352366	TNF, SMAD3, ZFHX3	2.38393	1	0.840908	99.9234
GOTERM_BP_FAT	GO:0031399~regulation of protein modification process	3	0.39267	0.400813	IL4, TNF, IL1B	2.14958	1	0.884037	99.9788
GOTERM_BP_FAT	GO:0051172~negative regulation of nitrogen compound metabolic process	4	0.52356	0.437074	TNF, SMAD3, ZFHX3, IL10	1.62909	1	0.908907	99.9924
GOTERM_BP_FAT	GO:0010558~negative regulation of macromolecule biosynthetic process	4	0.52356	0.471455	TNF, SMAD3, ZFHX3, IL10	1.5457	1	0.929412	99.9973
GOTERM_BP_FAT	GO:0031327~negative regulation of cellular biosynthetic process	4	0.52356	0.488311	TNF, SMAD3, ZFHX3, IL10	1.50713	1	0.937306	99.9984
GOTERM_BP_FAT	GO:0045892~negative regulation of transcription, DNA-dependent	3	0.39267	0.496809	TNF, SMAD3, ZFHX3	1.78125	1	0.940534	99.9988
GOTERM_BP_FAT	GO:0009890~negative regulation of biosynthetic process	4	0.52356	0.502561	TNF, SMAD3, ZFHX3, IL10	1.47557	1	0.942809	99.999
GOTERM_BP_FAT	GO:0051253~negative regulation of RNA metabolic process	3	0.39267	0.505737	TNF, SMAD3, ZFHX3	1.75173	1	0.943827	99.9991
GOTERM_BP_FAT	GO:0016481~negative regulation of transcription	3	0.39267	0.635558	TNF, SMAD3, ZFHX3	1.38154	1	0.982459	100
GOTERM_BP_FAT	GO:0010605~negative regulation of macromolecule metabolic process	4	0.52356	0.671963	TNF, SMAD3, ZFHX3, IL10	1.15191	1	0.988348	100
GOTERM_BP_FAT	GO:0010629~negative regulation of gene expression	3	0.39267	0.686298	TNF, SMAD3, ZFHX3	1.25818	1	0.990126	100
GOTERM_BP_FAT	GO:0045934~negative regulation of nucleobase, nucleoside, nucleotide and nucleic acid metabolic process	3	0.39267	0.694701	TNF, SMAD3, ZFHX3	1.23853	1	0.990902	100
GOTERM_BP_FAT	GO:0006355~regulation of transcription, DNA-dependent	8	1.04712	0.735718	IL4, TNFRSF1A, SLC11A1, TNF, VEGFA, SMAD3, ZFHX3, IL10	0.953751	1	0.994556	100
GOTERM_BP_FAT	GO:0051252~regulation of RNA metabolic process	8	1.04712	0.757356	IL4, TNFRSF1A, SLC11A1, TNF, VEGFA, SMAD3, ZFHX3, IL10	0.932708	1	0.995924	100
GOTERM_BP_FAT	GO:0045449~regulation of transcription	9	1.17801	0.936775	IL4, TNFRSF1A, SLC11A1, TNF, VEGFA, SMAD3, IL1B, ZFHX3, IL10	0.731401	1	0.999974	100
SP_PIR_KEYWORDS	acetylation	4	0.52356	0.996952	CASP3, VEGFA, SMAD3, MIF	0.423177	1	1	100
Annotation Cluster 34	Enrichment Score: 1.9388576205799821
Category	Term	Count	%	PValue	Genes	Fold Enrichment	Bonferroni	Benjamini	FDR
GOTERM_BP_FAT	GO:0051222~positive regulation of protein transport	7	0.91623	6.39481e-07	TNF, SMAD3, IL1B, IL10, NFKBIL1, LTA, TGFB2	22.084	0.000911484	4.34229e-05	0.00105601
GOTERM_BP_FAT	GO:0051094~positive regulation of developmental process	10	1.3089	5.14572e-06	AGTR1, TNFRSF1A, TNF, TGFBR2, SMAD3, ERAP1, IL1B, CCL5, ZFHX3, TGFB2	7.60342	0.00731096	0.0001983	0.00849714
GOTERM_BP_FAT	GO:0044093~positive regulation of molecular function	12	1.57068	7.26046e-05	IL4, AGTR1, SLC11A1, DAB1, NOD1, TNF, TGFBR2, SMAD3, IL1B, NLRP1, IL10, TGFB2	4.3285	0.0983581	0.00139818	0.119829
GOTERM_BP_FAT	GO:0051050~positive regulation of transport	8	1.04712	7.60456e-05	SLC11A1, TNF, SMAD3, IL1B, IL10, NFKBIL1, LTA, TGFB2	7.58296	0.102772	0.00142589	0.125505
GOTERM_BP_FAT	GO:0070304~positive regulation of stress-activated protein kinase signaling pathway	4	0.52356	0.000120585	NOD1, TNF, IL1B, TGFB2	40.2619	0.157991	0.00209493	0.198944
GOTERM_BP_FAT	GO:0050900~leukocyte migration	5	0.65445	0.000140213	TNF, IL1B, CCL5, IL10, TGFB2	18.5417	0.181234	0.00229572	0.231291
GOTERM_BP_FAT	GO:0045787~positive regulation of cell cycle	5	0.65445	0.000140213	TNF, IL1B, NFKBIL1, LTA, TGFB2	18.5417	0.181234	0.00229572	0.231291
GOTERM_BP_FAT	GO:0051130~positive regulation of cellular component organization	7	0.91623	0.000190637	SLC11A1, TNF, SMAD3, IL1B, NFKBIL1, LTA, TGFB2	8.17472	0.23805	0.00282802	0.314347
GOTERM_BP_FAT	GO:0030155~regulation of cell adhesion	6	0.78534	0.000434422	DAB1, TNF, IL18, SMAD3, IL1B, TGFB2	9.2573	0.461851	0.00532731	0.714978
GOTERM_BP_FAT	GO:0043085~positive regulation of catalytic activity	10	1.3089	0.000635984	AGTR1, SLC11A1, DAB1, NOD1, TNF, TGFBR2, SMAD3, IL1B, NLRP1, TGFB2	4.0649	0.596348	0.00717416	1.04508
GOTERM_BP_FAT	GO:0032874~positive regulation of stress-activated MAPK cascade	3	0.39267	0.00075241	NOD1, IL1B, TGFB2	70.4583	0.658135	0.00828595	1.23528
GOTERM_BP_FAT	GO:0032872~regulation of stress-activated MAPK cascade	3	0.39267	0.000937691	NOD1, IL1B, TGFB2	63.4125	0.737571	0.0101601	1.53726
GOTERM_BP_FAT	GO:0043410~positive regulation of MAPKKK cascade	4	0.52356	0.00143387	NOD1, TNF, IL1B, TGFB2	17.6146	0.870771	0.0146128	2.3417
GOTERM_BP_FAT	GO:0043408~regulation of MAPKKK cascade	5	0.65445	0.0016486	NOD1, TNF, IL1B, TIMP2, TGFB2	9.6961	0.904901	0.0164328	2.6879
GOTERM_BP_FAT	GO:0016477~cell migration	7	0.91623	0.0017518	DAB1, TNF, IL1B, CCL5, IL10, KDR, TGFB2	5.36096	0.917937	0.0172131	2.8539
GOTERM_BP_FAT	GO:0051174~regulation of phosphorus metabolic process	9	1.17801	0.00176463	IL4, SLC11A1, CASP3, DAB1, TNF, TGFBR2, SMAD3, IL1B, TGFB2	3.92242	0.919426	0.0171026	2.8745
GOTERM_BP_FAT	GO:0019220~regulation of phosphate metabolic process	9	1.17801	0.00176463	IL4, SLC11A1, CASP3, DAB1, TNF, TGFBR2, SMAD3, IL1B, TGFB2	3.92242	0.919426	0.0171026	2.8745
GOTERM_BP_FAT	GO:0045785~positive regulation of cell adhesion	4	0.52356	0.00272662	TNF, SMAD3, IL1B, TGFB2	14.0917	0.979625	0.0251265	4.40867
GOTERM_BP_FAT	GO:0048870~cell motility	7	0.91623	0.00298431	DAB1, TNF, IL1B, CCL5, IL10, KDR, TGFB2	4.81963	0.985906	0.0267812	4.81574
GOTERM_BP_FAT	GO:0051674~localization of cell	7	0.91623	0.00298431	DAB1, TNF, IL1B, CCL5, IL10, KDR, TGFB2	4.81963	0.985906	0.0267812	4.81574
GOTERM_BP_FAT	GO:0045860~positive regulation of protein kinase activity	6	0.78534	0.00376427	SLC11A1, DAB1, TNF, TGFBR2, IL1B, TGFB2	5.68722	0.995383	0.0315048	6.03795
GOTERM_BP_FAT	GO:0070302~regulation of stress-activated protein kinase signaling pathway	4	0.52356	0.00405261	NOD1, TNF, IL1B, TGFB2	12.2536	0.996944	0.0332972	6.48605
GOTERM_BP_FAT	GO:0051726~regulation of cell cycle	7	0.91623	0.00431596	CASP3, TNF, SMAD3, IL1B, NFKBIL1, LTA, TGFB2	4.47017	0.997904	0.0348267	6.89354
GOTERM_BP_FAT	GO:0033674~positive regulation of kinase activity	6	0.78534	0.00437119	SLC11A1, DAB1, TNF, TGFBR2, IL1B, TGFB2	5.49026	0.998064	0.0350674	6.97879
GOTERM_BP_FAT	GO:0051347~positive regulation of transferase activity	6	0.78534	0.00513429	SLC11A1, DAB1, TNF, TGFBR2, IL1B, TGFB2	5.28437	0.999351	0.0401782	8.14918
GOTERM_BP_FAT	GO:0045859~regulation of protein kinase activity	7	0.91623	0.00527224	SLC11A1, CASP3, DAB1, TNF, TGFBR2, IL1B, TGFB2	4.28877	0.999468	0.0410136	8.35928
GOTERM_BP_FAT	GO:0042325~regulation of phosphorylation	8	1.04712	0.00575889	IL4, SLC11A1, CASP3, DAB1, TNF, TGFBR2, IL1B, TGFB2	3.62876	0.999735	0.0433131	9.09684
GOTERM_BP_FAT	GO:0043549~regulation of kinase activity	7	0.91623	0.00620904	SLC11A1, CASP3, DAB1, TNF, TGFBR2, IL1B, TGFB2	4.14461	0.999861	0.045906	9.7741
GOTERM_BP_FAT	GO:0051338~regulation of transferase activity	7	0.91623	0.00754474	SLC11A1, CASP3, DAB1, TNF, TGFBR2, IL1B, TGFB2	3.97749	0.99998	0.0533447	11.7559
BIOCARTA	h_nthiPathway:NFkB activation by Nontypeable Hemophilus influenzae	4	0.52356	0.00920851	TNF, TGFBR2, SMAD3, IL1B	8.55357	0.471827	0.147501	9.10451
GOTERM_BP_FAT	GO:0010557~positive regulation of macromolecule biosynthetic process	9	1.17801	0.0105829	IL4, TNFRSF1A, SLC11A1, TNF, VEGFA, SMAD3, IL1B, IL10, TGFB2	2.90883	1	0.0687508	16.1125
GOTERM_BP_FAT	GO:0000060~protein import into nucleus, translocation	3	0.39267	0.0108799	SLC11A1, TNF, TGFB2	18.6507	1	0.0699872	16.5274
GOTERM_BP_FAT	GO:0080135~regulation of cellular response to stress	4	0.52356	0.0122336	NOD1, TNF, IL1B, TGFB2	8.20874	1	0.0773605	18.394
GOTERM_BP_FAT	GO:0009891~positive regulation of biosynthetic process	9	1.17801	0.0148654	IL4, TNFRSF1A, SLC11A1, TNF, VEGFA, SMAD3, IL1B, IL10, TGFB2	2.73723	1	0.090555	21.9113
GOTERM_BP_FAT	GO:0051336~regulation of hydrolase activity	6	0.78534	0.020153	AGTR1, NOD1, TNF, SMAD3, NLRP1, TGFB2	3.76335	1	0.116213	28.5519
GOTERM_BP_FAT	GO:0006928~cell motion	7	0.91623	0.02282	DAB1, TNF, IL1B, CCL5, IL10, KDR, TGFB2	3.115	1	0.127673	31.6964
KEGG_PATHWAY	hsa04010:MAPK signaling pathway	7	0.91623	0.0317186	TNFRSF1A, CASP3, TNF, TGFBR2, IL1B, CD14, TGFB2	2.83648	0.91085	0.125674	28.7006
KEGG_PATHWAY	hsa05210:Colorectal cancer	4	0.52356	0.0396741	CASP3, TGFBR2, SMAD3, TGFB2	5.15198	0.951983	0.147686	34.6143
KEGG_PATHWAY	hsa04350:TGF-beta signaling pathway	4	0.52356	0.0433199	TNF, TGFBR2, SMAD3, TGFB2	4.97432	0.9639	0.146291	37.173
GOTERM_BP_FAT	GO:0006606~protein import into nucleus	3	0.39267	0.0607919	SLC11A1, TNF, TGFB2	7.37355	1	0.274257	64.5025
GOTERM_BP_FAT	GO:0051170~nuclear import	3	0.39267	0.0632978	SLC11A1, TNF, TGFB2	7.20597	1	0.283245	66.0346
GOTERM_BP_FAT	GO:0034504~protein localization in nucleus	3	0.39267	0.0710207	SLC11A1, TNF, TGFB2	6.74601	1	0.309197	70.3747
GOTERM_BP_FAT	GO:0032147~activation of protein kinase activity	3	0.39267	0.0987416	SLC11A1, TGFBR2, TGFB2	5.5625	1	0.387925	82.0363
GOTERM_BP_FAT	GO:0017038~protein import	3	0.39267	0.124282	SLC11A1, TNF, TGFB2	4.84065	1	0.456906	88.8257
GOTERM_BP_FAT	GO:0043086~negative regulation of catalytic activity	4	0.52356	0.138495	CASP3, CCR2, IL1B, TGFB2	3.05235	1	0.490772	91.4717
GOTERM_BP_FAT	GO:0033365~protein localization in organelle	3	0.39267	0.147984	SLC11A1, TNF, TGFB2	4.34332	1	0.513454	92.8971
GOTERM_BP_FAT	GO:0006913~nucleocytoplasmic transport	3	0.39267	0.164265	SLC11A1, TNF, TGFB2	4.0649	1	0.550511	94.835
GOTERM_BP_FAT	GO:0051169~nuclear transport	3	0.39267	0.167559	SLC11A1, TNF, TGFB2	4.01345	1	0.556107	95.1612
GOTERM_MF_FAT	GO:0042802~identical protein binding	6	0.78534	0.181182	SLC11A1, NOD1, TNF, VEGFA, SMAD3, TGFB2	1.96316	1	0.838893	92.8225
GOTERM_BP_FAT	GO:0006468~protein amino acid phosphorylation	6	0.78534	0.19849	TNF, BLK, TGFBR2, IL1B, KDR, TGFB2	1.90142	1	0.618968	97.4107
GOTERM_BP_FAT	GO:0044092~negative regulation of molecular function	4	0.52356	0.203466	CASP3, CCR2, IL1B, TGFB2	2.53144	1	0.628053	97.6637
GOTERM_BP_FAT	GO:0006605~protein targeting	3	0.39267	0.264686	SLC11A1, TNF, TGFB2	2.94942	1	0.733021	99.3763
GOTERM_BP_FAT	GO:0007507~heart development	3	0.39267	0.264686	CASP3, TGFBR2, TGFB2	2.94942	1	0.733021	99.3763
GOTERM_BP_FAT	GO:0016310~phosphorylation	6	0.78534	0.315867	TNF, BLK, TGFBR2, IL1B, KDR, TGFB2	1.58531	1	0.800322	99.8105
GOTERM_BP_FAT	GO:0008104~protein localization	6	0.78534	0.392818	SLC11A1, TNF, CD40LG, IL10, NFKBIL1, TGFB2	1.43793	1	0.878147	99.9736
GOTERM_BP_FAT	GO:0006796~phosphate metabolic process	6	0.78534	0.477768	TNF, BLK, TGFBR2, IL1B, KDR, TGFB2	1.30344	1	0.932322	99.9978
GOTERM_BP_FAT	GO:0006793~phosphorus metabolic process	6	0.78534	0.477768	TNF, BLK, TGFBR2, IL1B, KDR, TGFB2	1.30344	1	0.932322	99.9978
GOTERM_BP_FAT	GO:0006886~intracellular protein transport	3	0.39267	0.52329	SLC11A1, TNF, TGFB2	1.69552	1	0.950699	99.9995
GOTERM_BP_FAT	GO:0034613~cellular protein localization	3	0.39267	0.574798	SLC11A1, TNF, TGFB2	1.54288	1	0.968711	99.9999
GOTERM_BP_FAT	GO:0070727~cellular macromolecule localization	3	0.39267	0.578797	SLC11A1, TNF, TGFB2	1.5317	1	0.969586	99.9999
GOTERM_BP_FAT	GO:0046907~intracellular transport	4	0.52356	0.596371	SLC11A1, TNF, CD209, TGFB2	1.28691	1	0.97413	100
GOTERM_BP_FAT	GO:0015031~protein transport	4	0.52356	0.696822	SLC11A1, TNF, CD40LG, TGFB2	1.10958	1	0.991033	100
GOTERM_BP_FAT	GO:0045184~establishment of protein localization	4	0.52356	0.702817	SLC11A1, TNF, CD40LG, TGFB2	1.09948	1	0.991492	100
Annotation Cluster 35	Enrichment Score: 1.8388221582031141
Category	Term	Count	%	PValue	Genes	Fold Enrichment	Bonferroni	Benjamini	FDR
GOTERM_BP_FAT	GO:0045670~regulation of osteoclast differentiation	3	0.39267	0.0046434	IL4, TNF, CCL5	28.8239	0.998689	0.0370075	7.39788
GOTERM_BP_FAT	GO:0002761~regulation of myeloid leukocyte differentiation	3	0.39267	0.015575	IL4, TNF, CCL5	15.4665	1	0.0939047	22.835
GOTERM_BP_FAT	GO:0045637~regulation of myeloid cell differentiation	3	0.39267	0.0420989	IL4, TNF, CCL5	9.05893	1	0.202539	50.8487
Annotation Cluster 36	Enrichment Score: 1.7724202599434158
Category	Term	Count	%	PValue	Genes	Fold Enrichment	Bonferroni	Benjamini	FDR
GOTERM_BP_FAT	GO:0042060~wound healing	8	1.04712	2.84223e-05	SLC11A1, CD40LG, FGB, TGFBR2, SMAD3, IL1B, CD40, TGFB2	8.8534	0.0397203	0.000643138	0.0469253
GOTERM_BP_FAT	GO:0030168~platelet activation	3	0.39267	0.00967682	CD40LG, FGB, CD40	19.8164	0.999999	0.0638974	14.8349
GOTERM_BP_FAT	GO:0050817~coagulation	3	0.39267	0.0817656	CD40LG, FGB, CD40	6.21691	1	0.338831	75.5529
GOTERM_BP_FAT	GO:0007596~blood coagulation	3	0.39267	0.0817656	CD40LG, FGB, CD40	6.21691	1	0.338831	75.5529
GOTERM_BP_FAT	GO:0007599~hemostasis	3	0.39267	0.0901327	CD40LG, FGB, CD40	5.87153	1	0.364611	78.9827
GOTERM_BP_FAT	GO:0050878~regulation of body fluid levels	3	0.39267	0.139979	CD40LG, FGB, CD40	4.49734	1	0.493638	91.711
Annotation Cluster 37	Enrichment Score: 1.764526395392512
Category	Term	Count	%	PValue	Genes	Fold Enrichment	Bonferroni	Benjamini	FDR
GOTERM_BP_FAT	GO:0051241~negative regulation of multicellular organismal process	5	0.65445	0.00712	SLC11A1, TNF, VEGFA, TGFBR2, IL10	6.44436	0.999962	0.0511674	11.1302
GOTERM_BP_FAT	GO:0048661~positive regulation of smooth muscle cell proliferation	3	0.39267	0.00909912	TNF, VEGFA, TGFBR2	20.4556	0.999998	0.0613151	14.0107
GOTERM_BP_FAT	GO:0048660~regulation of smooth muscle cell proliferation	3	0.39267	0.0193688	TNF, VEGFA, TGFBR2	13.7853	1	0.112363	27.6018
GOTERM_BP_FAT	GO:0030099~myeloid cell differentiation	3	0.39267	0.0697128	TNF, VEGFA, TGFBR2	6.81855	1	0.306088	69.6784
Annotation Cluster 38	Enrichment Score: 1.7585888041809126
Category	Term	Count	%	PValue	Genes	Fold Enrichment	Bonferroni	Benjamini	FDR
GOTERM_BP_FAT	GO:0051259~protein oligomerization	5	0.65445	0.00873547	TNFRSF1A, NOD1, ANGPT1, ITPR3, MIF	6.07399	0.999996	0.059488	13.4881
GOTERM_BP_FAT	GO:0070271~protein complex biogenesis	8	1.04712	0.00880795	TNFRSF1A, NOD1, FGB, SMAD3, ANGPT1, CD40, ITPR3, MIF	3.34851	0.999997	0.059685	13.5925
GOTERM_BP_FAT	GO:0006461~protein complex assembly	8	1.04712	0.00880795	TNFRSF1A, NOD1, FGB, SMAD3, ANGPT1, CD40, ITPR3, MIF	3.34851	0.999997	0.059685	13.5925
GOTERM_BP_FAT	GO:0043933~macromolecular complex subunit organization	9	1.17801	0.0167125	AGTR1, TNFRSF1A, NOD1, FGB, SMAD3, ANGPT1, CD40, ITPR3, MIF	2.6794	1	0.099219	24.2943
GOTERM_BP_FAT	GO:0065003~macromolecular complex assembly	8	1.04712	0.0342793	TNFRSF1A, NOD1, FGB, SMAD3, ANGPT1, CD40, ITPR3, MIF	2.54286	1	0.172914	43.7861
GOTERM_BP_FAT	GO:0051260~protein homooligomerization	3	0.39267	0.0723366	ANGPT1, ITPR3, MIF	6.675	1	0.313188	71.0602
Annotation Cluster 39	Enrichment Score: 1.6739205090482956
Category	Term	Count	%	PValue	Genes	Fold Enrichment	Bonferroni	Benjamini	FDR
GOTERM_BP_FAT	GO:0003013~circulatory system process	5	0.65445	0.0109702	AGTR1, ACE, MTHFR, VEGFA, ERAP1	5.68212	1	0.0702351	16.6531
GOTERM_BP_FAT	GO:0008015~blood circulation	5	0.65445	0.0109702	AGTR1, ACE, MTHFR, VEGFA, ERAP1	5.68212	1	0.0702351	16.6531
GOTERM_BP_FAT	GO:0008217~regulation of blood pressure	3	0.39267	0.0790338	AGTR1, ACE, ERAP1	6.34125	1	0.331068	74.3237
Annotation Cluster 40	Enrichment Score: 1.5715268570226077
Category	Term	Count	%	PValue	Genes	Fold Enrichment	Bonferroni	Benjamini	FDR
GOTERM_BP_FAT	GO:0045597~positive regulation of cell differentiation	6	0.78534	0.00421333	AGTR1, TGFBR2, SMAD3, CCL5, ZFHX3, TGFB2	5.53821	0.997573	0.0343996	6.73493
GOTERM_BP_FAT	GO:0016202~regulation of striated muscle tissue development	3	0.39267	0.0226541	TGFBR2, SMAD3, ZFHX3	12.6825	1	0.127289	31.5047
GOTERM_BP_FAT	GO:0048634~regulation of muscle development	3	0.39267	0.0235089	TGFBR2, SMAD3, ZFHX3	12.4338	1	0.129801	32.4874
GOTERM_MF_FAT	GO:0019899~enzyme binding	5	0.65445	0.230615	TGFBR2, SMAD3, CD40, ZFHX3, NLRP1	2.00194	1	0.886591	96.8408
Annotation Cluster 41	Enrichment Score: 1.51173563460675
Category	Term	Count	%	PValue	Genes	Fold Enrichment	Bonferroni	Benjamini	FDR
GOTERM_MF_FAT	GO:0030246~carbohydrate binding	6	0.78534	0.0250817	MBL2, NOD1, CD209, VEGFA, TGFBR2, CD14	3.54921	0.999051	0.261113	28.448
GOTERM_MF_FAT	GO:0005539~glycosaminoglycan binding	4	0.52356	0.0280415	NOD1, VEGFA, TGFBR2, CD14	5.98295	0.999587	0.277266	31.2584
GOTERM_MF_FAT	GO:0001871~pattern binding	4	0.52356	0.0357232	NOD1, VEGFA, TGFBR2, CD14	5.43904	0.999953	0.31843	38.0833
GOTERM_MF_FAT	GO:0030247~polysaccharide binding	4	0.52356	0.0357232	NOD1, VEGFA, TGFBR2, CD14	5.43904	0.999953	0.31843	38.0833
Annotation Cluster 42	Enrichment Score: 1.491100233560258
Category	Term	Count	%	PValue	Genes	Fold Enrichment	Bonferroni	Benjamini	FDR
GOTERM_BP_FAT	GO:0048871~multicellular organismal homeostasis	5	0.65445	0.000652074	SLC11A1, VEGFA, IL1B, COL11A2, KDR	12.4338	0.60551	0.00729735	1.07138
GOTERM_BP_FAT	GO:0001894~tissue homeostasis	3	0.39267	0.0347549	VEGFA, COL11A2, KDR	10.0655	1	0.173924	44.2416
GOTERM_BP_FAT	GO:0060249~anatomical structure homeostasis	3	0.39267	0.0873158	VEGFA, COL11A2, KDR	5.98231	1	0.356066	77.882
KEGG_PATHWAY	hsa04510:Focal adhesion	3	0.39267	0.548521	VEGFA, COL11A2, KDR	1.6148	1	0.86304	99.9763
Annotation Cluster 43	Enrichment Score: 1.4893305259406566
Category	Term	Count	%	PValue	Genes	Fold Enrichment	Bonferroni	Benjamini	FDR
GOTERM_BP_FAT	GO:0050678~regulation of epithelial cell proliferation	5	0.65445	0.000328502	VEGFA, SMAD3, MMP12, KDR, TGFB2	14.8856	0.374073	0.00425022	0.541097
GOTERM_MF_FAT	GO:0005160~transforming growth factor beta receptor binding	3	0.39267	0.00282214	TGFBR2, SMAD3, TGFB2	36.9535	0.539002	0.0503141	3.65582
GOTERM_BP_FAT	GO:0045597~positive regulation of cell differentiation	6	0.78534	0.00421333	AGTR1, TGFBR2, SMAD3, CCL5, ZFHX3, TGFB2	5.53821	0.997573	0.0343996	6.73493
GOTERM_BP_FAT	GO:0030334~regulation of cell migration	5	0.65445	0.00790051	ACE, VEGFA, SMAD3, KDR, TGFB2	6.2537	0.999988	0.0552534	12.2769
GOTERM_BP_FAT	GO:0030335~positive regulation of cell migration	4	0.52356	0.00822476	VEGFA, SMAD3, KDR, TGFB2	9.5	0.999992	0.0569086	12.7491
GOTERM_BP_FAT	GO:0040017~positive regulation of locomotion	4	0.52356	0.0106949	VEGFA, SMAD3, KDR, TGFB2	8.62755	1	0.0691434	16.2692
GOTERM_BP_FAT	GO:0051272~positive regulation of cell motion	4	0.52356	0.0106949	VEGFA, SMAD3, KDR, TGFB2	8.62755	1	0.0691434	16.2692
GOTERM_BP_FAT	GO:0040012~regulation of locomotion	5	0.65445	0.0122142	ACE, VEGFA, SMAD3, KDR, TGFB2	5.50456	1	0.077584	18.3675
GOTERM_BP_FAT	GO:0051270~regulation of cell motion	5	0.65445	0.01243	ACE, VEGFA, SMAD3, KDR, TGFB2	5.47604	1	0.0782157	18.6615
GOTERM_BP_FAT	GO:0007167~enzyme linked receptor protein signaling pathway	6	0.78534	0.0213248	VEGFA, TGFBR2, SMAD3, ANGPT1, KDR, TGFB2	3.70833	1	0.120684	29.9499
GOTERM_BP_FAT	GO:0022604~regulation of cell morphogenesis	4	0.52356	0.0231145	VEGFA, SMAD3, KDR, TGFB2	6.4542	1	0.128729	32.0356
KEGG_PATHWAY	hsa05212:Pancreatic cancer	4	0.52356	0.026758	VEGFA, TGFBR2, SMAD3, TGFB2	6.01064	0.869213	0.112776	24.7724
GOTERM_BP_FAT	GO:0007179~transforming growth factor beta receptor signaling pathway	3	0.39267	0.0317785	TGFBR2, SMAD3, TGFB2	10.5687	1	0.163472	41.3333
KEGG_PATHWAY	hsa05210:Colorectal cancer	4	0.52356	0.0396741	CASP3, TGFBR2, SMAD3, TGFB2	5.15198	0.951983	0.147686	34.6143
GOTERM_MF_FAT	GO:0046983~protein dimerization activity	7	0.91623	0.0411784	AGTR1, SLC11A1, VEGFA, TGFBR2, SMAD3, COL11A2, TGFB2	2.70447	0.99999	0.347362	42.5436
KEGG_PATHWAY	hsa04350:TGF-beta signaling pathway	4	0.52356	0.0433199	TNF, TGFBR2, SMAD3, TGFB2	4.97432	0.9639	0.146291	37.173
GOTERM_MF_FAT	GO:0046982~protein heterodimerization activity	4	0.52356	0.0742396	AGTR1, TGFBR2, COL11A2, TGFB2	4.02699	1	0.529928	63.8163
GOTERM_BP_FAT	GO:0007178~transmembrane receptor protein serine/threonine kinase signaling pathway	3	0.39267	0.0831425	TGFBR2, SMAD3, TGFB2	6.15655	1	0.342689	76.1513
KEGG_PATHWAY	hsa05220:Chronic myeloid leukemia	3	0.39267	0.146988	TGFBR2, SMAD3, TGFB2	4.32766	0.999993	0.357004	81.1475
GOTERM_MF_FAT	GO:0042802~identical protein binding	6	0.78534	0.181182	SLC11A1, NOD1, TNF, VEGFA, SMAD3, TGFB2	1.96316	1	0.838893	92.8225
GOTERM_MF_FAT	GO:0042803~protein homodimerization activity	4	0.52356	0.20699	SLC11A1, VEGFA, SMAD3, TGFB2	2.50782	1	0.871248	95.2937
GOTERM_BP_FAT	GO:0040008~regulation of growth	4	0.52356	0.211908	AGTR1, TGFBR2, SMAD3, TGFB2	2.47947	1	0.643772	98.0407
GOTERM_BP_FAT	GO:0001558~regulation of cell growth	3	0.39267	0.228424	AGTR1, SMAD3, TGFB2	3.26869	1	0.672803	98.619
KEGG_PATHWAY	hsa05200:Pathways in cancer	5	0.65445	0.344973	CASP3, VEGFA, TGFBR2, SMAD3, TGFB2	1.64926	1	0.665183	98.8207
GOTERM_CC_FAT	GO:0005829~cytosol	6	0.78534	0.786729	MTHFR, CASP3, MSH5, TGFBR2, SMAD3, ERAP1	0.915288	1	0.996327	100
Annotation Cluster 44	Enrichment Score: 1.486149916711219
Category	Term	Count	%	PValue	Genes	Fold Enrichment	Bonferroni	Benjamini	FDR
SP_PIR_KEYWORDS	mitogen	4	0.52356	0.000352554	VEGFA, IL1B, TIMP2, TGFB2	28.5916	0.0641423	0.00389193	0.436532
GOTERM_CC_FAT	GO:0030141~secretory granule	6	0.78534	0.0017718	SLC11A1, FGB, VEGFA, ABCC4, IL1B, TGFB2	6.76296	0.201658	0.0171753	2.03558
GOTERM_CC_FAT	GO:0044433~cytoplasmic vesicle part	5	0.65445	0.0127966	SLC11A1, FGB, VEGFA, ABCC4, TGFB2	5.42484	0.805176	0.103309	13.8742
GOTERM_BP_FAT	GO:0051781~positive regulation of cell division	3	0.39267	0.0141584	VEGFA, IL1B, TGFB2	16.2596	1	0.0871509	20.9807
GOTERM_CC_FAT	GO:0031093~platelet alpha granule lumen	3	0.39267	0.0168119	FGB, VEGFA, TGFB2	14.8455	0.883896	0.125916	17.8503
GOTERM_CC_FAT	GO:0060205~cytoplasmic membrane-bounded vesicle lumen	3	0.39267	0.0192162	FGB, VEGFA, TGFB2	13.8333	0.914924	0.134937	20.15
GOTERM_BP_FAT	GO:0051302~regulation of cell division	3	0.39267	0.0201697	VEGFA, IL1B, TGFB2	13.492	1	0.115841	28.572
GOTERM_CC_FAT	GO:0031983~vesicle lumen	3	0.39267	0.0208945	FGB, VEGFA, TGFB2	13.2319	0.931555	0.138417	21.7203
GOTERM_CC_FAT	GO:0031091~platelet alpha granule	3	0.39267	0.0301457	FGB, VEGFA, TGFB2	10.869	0.979501	0.185026	29.8812
GOTERM_CC_FAT	GO:0016023~cytoplasmic membrane-bounded vesicle	7	0.91623	0.0497519	SLC11A1, FGB, VEGFA, CTLA4, ABCC4, IL1B, TGFB2	2.58222	0.998468	0.265543	44.6682
GOTERM_CC_FAT	GO:0031988~membrane-bounded vesicle	7	0.91623	0.0565259	SLC11A1, FGB, VEGFA, CTLA4, ABCC4, IL1B, TGFB2	2.50039	0.999382	0.285301	49.0737
GOTERM_CC_FAT	GO:0031410~cytoplasmic vesicle	7	0.91623	0.090044	SLC11A1, FGB, VEGFA, CTLA4, ABCC4, IL1B, TGFB2	2.21218	0.999994	0.406089	66.5222
GOTERM_CC_FAT	GO:0031982~vesicle	7	0.91623	0.105088	SLC11A1, FGB, VEGFA, CTLA4, ABCC4, IL1B, TGFB2	2.11973	0.999999	0.431088	72.4072
GOTERM_MF_FAT	GO:0042803~protein homodimerization activity	4	0.52356	0.20699	SLC11A1, VEGFA, SMAD3, TGFB2	2.50782	1	0.871248	95.2937
GOTERM_CC_FAT	GO:0043233~organelle lumen	8	1.04712	0.798516	CASP3, FGB, VEGFA, SMAD3, ERAP1, ITPR3, ZFHX3, TGFB2	0.891819	1	0.995909	100
GOTERM_CC_FAT	GO:0031974~membrane-enclosed lumen	8	1.04712	0.815296	CASP3, FGB, VEGFA, SMAD3, ERAP1, ITPR3, ZFHX3, TGFB2	0.874521	1	0.995914	100
Annotation Cluster 45	Enrichment Score: 1.4729968791989654
Category	Term	Count	%	PValue	Genes	Fold Enrichment	Bonferroni	Benjamini	FDR
SP_PIR_KEYWORDS	Signal-anchor	7	0.91623	0.00370038	TNF, CD40LG, CD209, BTNL2, ERAP1, ABO, NAALADL2	4.6351	0.501903	0.0286224	4.49536
GOTERM_BP_FAT	GO:0007159~leukocyte adhesion	3	0.39267	0.00746323	TNF, CD40LG, CD209	22.6473	0.999977	0.0533084	11.6362
GOTERM_BP_FAT	GO:0007155~cell adhesion	7	0.91623	0.10636	DAB1, TNF, CD40LG, CCR3, CD209, COL11A2, CCL5	2.11375	1	0.409917	84.3861
GOTERM_BP_FAT	GO:0022610~biological adhesion	7	0.91623	0.106902	DAB1, TNF, CD40LG, CCR3, CD209, COL11A2, CCL5	2.11073	1	0.410569	84.5416
GOTERM_BP_FAT	GO:0016337~cell-cell adhesion	4	0.52356	0.137428	DAB1, TNF, CD40LG, CD209	3.06341	1	0.489001	91.2955
Annotation Cluster 46	Enrichment Score: 1.2990654969719013
Category	Term	Count	%	PValue	Genes	Fold Enrichment	Bonferroni	Benjamini	FDR
GOTERM_BP_FAT	GO:0051726~regulation of cell cycle	7	0.91623	0.00431596	CASP3, TNF, SMAD3, IL1B, NFKBIL1, LTA, TGFB2	4.47017	0.997904	0.0348267	6.89354
KEGG_PATHWAY	hsa04010:MAPK signaling pathway	7	0.91623	0.0317186	TNFRSF1A, CASP3, TNF, TGFBR2, IL1B, CD14, TGFB2	2.83648	0.91085	0.125674	28.7006
KEGG_PATHWAY	hsa04210:Apoptosis	4	0.52356	0.0433199	TNFRSF1A, CASP3, TNF, IL1B	4.97432	0.9639	0.146291	37.173
KEGG_PATHWAY	hsa05010:Alzheimer's disease	5	0.65445	0.0585894	TNFRSF1A, CASP3, TNF, IL1B, ITPR3	3.31876	0.9892	0.186026	46.9347
KEGG_PATHWAY	hsa05014:Amyotrophic lateral sclerosis (ALS)	3	0.39267	0.0825012	TNFRSF1A, CASP3, TNF	6.12405	0.998432	0.244801	59.4918
BIOCARTA	h_tnfr1Pathway:TNFR1 Signaling Pathway	3	0.39267	0.107175	TNFRSF1A, CASP3, TNF	5.13214	0.999599	0.5089	68.9563
BIOCARTA	h_HivnefPathway:HIV-I Nef: negative effector of Fas and TNF	3	0.39267	0.262475	TNFRSF1A, CASP3, TNF	2.90499	1	0.826334	95.6785
Annotation Cluster 47	Enrichment Score: 0.6306714647620469
Category	Term	Count	%	PValue	Genes	Fold Enrichment	Bonferroni	Benjamini	FDR
UP_SEQ_FEATURE	repeat:LRR 7	3	0.39267	0.130973	NOD1, NLRP1, CD14	4.69492	1	0.817349	85.0515
UP_SEQ_FEATURE	repeat:LRR 6	3	0.39267	0.171676	NOD1, NLRP1, CD14	3.95714	1	0.88916	92.1918
UP_SEQ_FEATURE	repeat:LRR 5	3	0.39267	0.198561	NOD1, NLRP1, CD14	3.5974	1	0.910424	95.0048
UP_SEQ_FEATURE	repeat:LRR 4	3	0.39267	0.225925	NOD1, NLRP1, CD14	3.29762	1	0.932882	96.8791
UP_SEQ_FEATURE	repeat:LRR 3	3	0.39267	0.287898	NOD1, NLRP1, CD14	2.77926	1	0.968871	98.9916
UP_SEQ_FEATURE	repeat:LRR 1	3	0.39267	0.312913	NOD1, NLRP1, CD14	2.61321	1	0.972933	99.3786
UP_SEQ_FEATURE	repeat:LRR 2	3	0.39267	0.314225	NOD1, NLRP1, CD14	2.60502	1	0.970524	99.3945
SP_PIR_KEYWORDS	leucine-rich repeat	3	0.39267	0.315482	NOD1, NLRP1, CD14	2.59722	1	0.76643	99.0929
Annotation Cluster 48	Enrichment Score: 0.35724180540332756
Category	Term	Count	%	PValue	Genes	Fold Enrichment	Bonferroni	Benjamini	FDR
UP_SEQ_FEATURE	nucleotide phosphate-binding region:ATP	7	0.91623	0.126689	NOD1, BLK, MSH5, TGFBR2, ITPKC, NLRP1, KDR	2.01559	1	0.817993	84.0222
SP_PIR_KEYWORDS	atp-binding	8	1.04712	0.186871	NOD1, BLK, MSH5, TGFBR2, ABCC4, ITPKC, NLRP1, KDR	1.68186	1	0.603854	92.3201
GOTERM_BP_FAT	GO:0006468~protein amino acid phosphorylation	6	0.78534	0.19849	TNF, BLK, TGFBR2, IL1B, KDR, TGFB2	1.90142	1	0.618968	97.4107
UP_SEQ_FEATURE	binding site:ATP	4	0.52356	0.303581	BLK, TGFBR2, ITPKC, KDR	2.04428	1	0.972268	99.2541
GOTERM_BP_FAT	GO:0016310~phosphorylation	6	0.78534	0.315867	TNF, BLK, TGFBR2, IL1B, KDR, TGFB2	1.58531	1	0.800322	99.8105
SP_PIR_KEYWORDS	nucleotide-binding	8	1.04712	0.386884	NOD1, BLK, MSH5, TGFBR2, ABCC4, ITPKC, NLRP1, KDR	1.32274	1	0.841087	99.7688
GOTERM_MF_FAT	GO:0005524~ATP binding	9	1.17801	0.391481	NOD1, BLK, MSH5, TGFBR2, ABCC4, ITPKC, HLA-DOB, NLRP1, KDR	1.27598	1	0.979527	99.8564
GOTERM_MF_FAT	GO:0032559~adenyl ribonucleotide binding	9	1.17801	0.40639	NOD1, BLK, MSH5, TGFBR2, ABCC4, ITPKC, HLA-DOB, NLRP1, KDR	1.25894	1	0.981116	99.8964
SP_PIR_KEYWORDS	kinase	4	0.52356	0.440913	BLK, TGFBR2, ITPKC, KDR	1.62074	1	0.882743	99.9264
GOTERM_MF_FAT	GO:0030554~adenyl nucleotide binding	9	1.17801	0.466003	NOD1, BLK, MSH5, TGFBR2, ABCC4, ITPKC, HLA-DOB, NLRP1, KDR	1.19507	1	0.98915	99.9743
GOTERM_BP_FAT	GO:0006796~phosphate metabolic process	6	0.78534	0.477768	TNF, BLK, TGFBR2, IL1B, KDR, TGFB2	1.30344	1	0.932322	99.9978
GOTERM_BP_FAT	GO:0006793~phosphorus metabolic process	6	0.78534	0.477768	TNF, BLK, TGFBR2, IL1B, KDR, TGFB2	1.30344	1	0.932322	99.9978
GOTERM_MF_FAT	GO:0001883~purine nucleoside binding	9	1.17801	0.48375	NOD1, BLK, MSH5, TGFBR2, ABCC4, ITPKC, HLA-DOB, NLRP1, KDR	1.17716	1	0.990392	99.9836
GOTERM_MF_FAT	GO:0001882~nucleoside binding	9	1.17801	0.491846	NOD1, BLK, MSH5, TGFBR2, ABCC4, ITPKC, HLA-DOB, NLRP1, KDR	1.16912	1	0.990316	99.9866
UP_SEQ_FEATURE	domain:Protein kinase	3	0.39267	0.49992	BLK, TGFBR2, KDR	1.77186	1	0.998154	99.9916
GOTERM_MF_FAT	GO:0004672~protein kinase activity	4	0.52356	0.546957	BLK, TGFBR2, KDR, TGFB2	1.3822	1	0.994965	99.9971
INTERPRO	IPR000719:Protein kinase, core	3	0.39267	0.574582	BLK, TGFBR2, KDR	1.54402	1	0.998747	99.9971
GOTERM_MF_FAT	GO:0032553~ribonucleotide binding	9	1.17801	0.646904	NOD1, BLK, MSH5, TGFBR2, ABCC4, ITPKC, HLA-DOB, NLRP1, KDR	1.02649	1	0.998877	99.9999
GOTERM_MF_FAT	GO:0032555~purine ribonucleotide binding	9	1.17801	0.646904	NOD1, BLK, MSH5, TGFBR2, ABCC4, ITPKC, HLA-DOB, NLRP1, KDR	1.02649	1	0.998877	99.9999
UP_SEQ_FEATURE	active site:Proton acceptor	3	0.39267	0.684312	BLK, TGFBR2, KDR	1.26292	1	0.999962	100
GOTERM_MF_FAT	GO:0017076~purine nucleotide binding	9	1.17801	0.696948	NOD1, BLK, MSH5, TGFBR2, ABCC4, ITPKC, HLA-DOB, NLRP1, KDR	0.982601	1	0.999503	100
SP_PIR_KEYWORDS	transferase	5	0.65445	0.735676	BLK, TGFBR2, ITPKC, ABO, KDR	0.999886	1	0.98559	100
GOTERM_MF_FAT	GO:0000166~nucleotide binding	9	1.17801	0.850657	NOD1, BLK, MSH5, TGFBR2, ABCC4, ITPKC, HLA-DOB, NLRP1, KDR	0.839478	1	0.999991	100
Annotation Cluster 49	Enrichment Score: 0.3512549500556207
Category	Term	Count	%	PValue	Genes	Fold Enrichment	Bonferroni	Benjamini	FDR
KEGG_PATHWAY	hsa05010:Alzheimer's disease	5	0.65445	0.0585894	TNFRSF1A, CASP3, TNF, IL1B, ITPR3	3.31876	0.9892	0.186026	46.9347
GOTERM_BP_FAT	GO:0050890~cognition	4	0.52356	0.804787	CASP3, IL1B, ITPR3, COL11A2	0.930143	1	0.998219	100
GOTERM_BP_FAT	GO:0007600~sensory perception	3	0.39267	0.898044	CASP3, ITPR3, COL11A2	0.78287	1	0.999846	100
GOTERM_BP_FAT	GO:0050877~neurological system process	4	0.52356	0.929356	CASP3, IL1B, ITPR3, COL11A2	0.69876	1	0.999961	100
Annotation Cluster 50	Enrichment Score: 0.2645738711404164
Category	Term	Count	%	PValue	Genes	Fold Enrichment	Bonferroni	Benjamini	FDR
GOTERM_CC_FAT	GO:0000267~cell fraction	8	1.04712	0.270105	ACE, CD40LG, FGB, CCR2, ABCC4, HLA-C, HLA-B, ITPR3, CCL5	1.49872	1	0.724699	97.4045
GOTERM_CC_FAT	GO:0005624~membrane fraction	4	0.52356	0.760789	ACE, ABCC4, HLA-C, HLA-B, ITPR3	1.00316	1	0.995933	100
GOTERM_CC_FAT	GO:0005626~insoluble fraction	4	0.52356	0.782495	ACE, ABCC4, HLA-C, HLA-B, ITPR3	0.967289	1	0.996648	100
Annotation Cluster 51	Enrichment Score: 0.13266288428771464
Category	Term	Count	%	PValue	Genes	Fold Enrichment	Bonferroni	Benjamini	FDR
GOTERM_CC_FAT	GO:0012505~endomembrane system	5	0.65445	0.530627	SLC11A1, SMAD3, ABCC4, ITPR3, ABO	1.29724	1	0.950302	99.9845
GOTERM_BP_FAT	GO:0006811~ion transport	4	0.52356	0.701966	MBL2, SLC11A1, ABCC4, ITPR3	1.10091	1	0.991508	100
GOTERM_BP_FAT	GO:0055085~transmembrane transport	3	0.39267	0.749413	SLC11A1, ABCC4, ITPR3	1.11446	1	0.995448	100
GOTERM_CC_FAT	GO:0031090~organelle membrane	5	0.65445	0.789945	SLC11A1, SMAD3, ABCC4, ITPR3, ABO	0.925588	1	0.995932	100
SP_PIR_KEYWORDS	transport	3	0.39267	0.984605	SLC11A1, ABCC4, ITPR3	0.500781	1	0.999997	100
Annotation Cluster 52	Enrichment Score: 0.05924473912395754
Category	Term	Count	%	PValue	Genes	Fold Enrichment	Bonferroni	Benjamini	FDR
GOTERM_CC_FAT	GO:0043233~organelle lumen	8	1.04712	0.798516	CASP3, FGB, VEGFA, SMAD3, ERAP1, ITPR3, ZFHX3, TGFB2	0.891819	1	0.995909	100
GOTERM_CC_FAT	GO:0005654~nucleoplasm	4	0.52356	0.81082	CASP3, SMAD3, ITPR3, ZFHX3	0.920131	1	0.99617	100
GOTERM_CC_FAT	GO:0031974~membrane-enclosed lumen	8	1.04712	0.815296	CASP3, FGB, VEGFA, SMAD3, ERAP1, ITPR3, ZFHX3, TGFB2	0.874521	1	0.995914	100
GOTERM_CC_FAT	GO:0031981~nuclear lumen	4	0.52356	0.977386	CASP3, SMAD3, ITPR3, ZFHX3	0.559693	1	0.999992	100
GOTERM_CC_FAT	GO:0070013~intracellular organelle lumen	5	0.65445	0.979912	CASP3, SMAD3, ERAP1, ITPR3, ZFHX3	0.570233	1	0.999993	100
